# Supplementary material
Source: PubMed Central journal article supplement (PMC3985771)
Supplement: ac403636b_si_001.pdf [file ac403636b_si_001.pdf]

**Supplemental Table 1. Summary of d<sub>0</sub>- and d<sub>10</sub>-DMDSSO inter-linked cytochrome C peptides identified by LC MS<sup>n</sup>**

| Peptide Sequence              | AA Location   | Mod. Position  | Distance (α-α) | z | d <sub>0</sub> -dmDSSO |       |                     |         |            | d <sub>10</sub> -dmDSSO |       |                     |         |            |
|-------------------------------|---------------|----------------|----------------|---|------------------------|-------|---------------------|---------|------------|-------------------------|-------|---------------------|---------|------------|
|                               |               |                |                |   | MS m/z                 | Δ ppm | MS2 m/z             | z       | Δ ppm      | MS m/z                  | Δ ppm | MS2 m/z             | z       | Δ ppm      |
| Ac-GDVEKGK<br>KIFVQK          | 1-7<br>8-13   | 5T<br>8A       | 5.32           | 3 | 574.6436               | 1.00  | 874.400<br>415.761  | 1<br>2  | 2.9<br>1.5 | 577.9993                | 1.92  | 879.430<br>418.277  | 1<br>2  | 1.3<br>2.3 |
| Ac-GDVEKGK<br>KTGQAPGFSYTDANK | 1-7<br>39-53  | 5T<br>39A      | 26.19          | 3 | 848.7386               | 1.27  | 874.400<br>826.901  | 1<br>2  | 2.9<br>2.0 | 852.0922                | 1.97  | 879.429<br>829.416  | 1<br>2  | 0.1<br>1.1 |
| Ac-GDVEKGK<br>KK*             | 1-7<br>87-88  | 5A<br>87       | 12.98          | 3 | 412.2164               | 0.10  | 421.716<br>375.207* | 2<br>1* | 1.5<br>--  | 415.571                 | 0.74  | 424.233<br>380.239* | 2<br>1* | 2.3<br>--  |
| Ac-GDVEKGK<br>KKGGER          | 1-7<br>87-91  | 5T<br>87A      | 12.98          | 3 | 526.2721               | 0.85  | 874.398<br>343.204  | 1<br>2  | 0.6<br>2.3 | 529.6268                | 0.52  | 879.429<br>345.720  | 1<br>2  | 0.1<br>3.2 |
| Ac-GDVEKGK<br>KKGREDLIAYLK    | 1-7<br>87-99  | 5T<br>87 88A   | 13.03          | 4 | 631.335                | 1.02  | 874.399<br>544.311  | 1<br>3  | 1.7<br>1.3 | 633.8503                | 0.14  | 879.427<br>545.988  | 1<br>3  | 2.1<br>1.1 |
| Ac-GDVEKGKK<br>KK*            | 1-8<br>87-88  | 5 7A<br>87T    | 15.70          | 3 | 454.92                 |       |                     |         |            | 458.2704                | 3.02  | 488.280<br>380.239* | 2<br>1* | 3.0<br>--  |
| Ac-GDVEKGKK<br>KKGGER         | 1-8<br>87-91  | 5 7A<br>87 88A | 15.73          | 4 | 426.9799               | 0.56  | 501.750<br>343.203  | 2<br>2  | 0.3<br>0.6 | 429.4966                | 2.28  | 504.266<br>361.706  | 2<br>2  | 0.9<br>2.9 |
| Ac-GDVEKGKK<br>KKGREDLIAYLK   | 1-8<br>87-99  | 5 7T<br>87 88A | 15.73          | 5 | 530.8882               | 1.73  | 501.751<br>544.311  | 2<br>3  | 2.3<br>1.3 | 532.9012                | 0.54  | 504.265<br>545.988  | 2<br>3  | 1.1<br>1.1 |
| KIFVQK<br>GGKHK*              | 8-13<br>23-27 | 8A<br>25T      | 20.41          | 3 | 491.947                | 1.23  | 415.760<br>626.312* | 2<br>1* | 3.9<br>--  | 495.3013                | 1.31  | 418.279<br>631.342* | 2<br>1* | 4.3<br>--  |
| KIFVQK<br>KTGQAPGFSYTDANK     | 8-13<br>39-53 | 8T<br>39A      | 25.89          | 3 | 844.7656               | 1.09  | 862.487<br>826.901  | 1<br>2  | 1.7<br>2.0 | 848.12                  |       |                     |         |            |
| KIFVQK<br>KK*                 | 8-13<br>87-88 | 8A<br>87T      | 14.81          | 3 | 408.2464               | 1.52  | 415.760<br>375.207* | 2<br>1* | 3.9<br>--  | 411.601                 | 2.34  | 418.277<br>380.24*  | 2<br>1* | 2.1<br>--  |
| KIFVQK<br>KKGGER              | 8-13<br>87-91 | 8A<br>87 88T   | 15.72          | 4 | 391.978                | 0.36  | 415.761<br>359.190  | 2<br>2  | 1.5<br>2.1 | 394.4941                | 0.15  | 418.276<br>361.705  | 2<br>2  | 2.3<br>2.9 |

|                                         |                 |            |       |   |           |      |                     |         |            |          |      |                     |         |            |
|-----------------------------------------|-----------------|------------|-------|---|-----------|------|---------------------|---------|------------|----------|------|---------------------|---------|------------|
| KIFVQK<br>KGER*                         | 8-13<br>88-91   | 8A<br>88T  | 15.72 | 3 | 479.6041  | 3.31 | 415.764<br>589.279* | 2<br>1* | 4.8<br>--  | 482.957  | 0.47 | 418.277<br>612.323* | 2<br>1* | 2.3<br>--  |
| KIFVQK<br>EDLIAYLKK                     | 8-13<br>92-100  | 8T<br>99A  | 14.39 | 3 | 680.72    |      |                     |         |            | 684.0757 | 3.07 | 867.513<br>583.346  | 1<br>2  | 4.5<br>2.4 |
| KIFVQK<br>GEREDLIAYLKK                  | 8-13<br>89-100  | 8A<br>99T  | 14.39 | 4 | 596.3345  | 0.60 | 415.761<br>767.902  | 2<br>2  | 1.5<br>2.2 | 598.8497 | 0.10 | 418.277<br>770.417  | 2<br>2  | 2.3<br>1.3 |
| GGKHK*<br>HKTGPNLHGLFGR                 | 23-27<br>26-38  | 25A<br>27T | 6.29  | 5 | 429.8293  | 1.84 | 297.672*<br>511.929 | 2*<br>3 | --<br>4.6  | 431.8418 | 1.71 | 300.189*<br>513.607 | 2*<br>3 | --<br>4.4  |
| GGKHK<br>KTGQAPGFSYTDANK                | 23-27<br>39-53  | 25T<br>39A | 19.25 | 3 | 766.0388  | 1.38 | 626.309<br>826.900  | 1<br>2  | 1.8<br>0.8 | 769.3952 | 0.04 | 631.341<br>829.416  | 1<br>2  | 2.7<br>1.1 |
| GGKHK<br>GITWGEETLMEYLENPKK             | 23-27<br>56-73  | 25T<br>72A | 24.02 | 3 | 950.4685  | 3.67 | 626.308<br>1119.520 | 1<br>2  | 0.2<br>5.8 | 953.82   |      |                     |         |            |
| KTGQAPGFSYTDANK<br>KTGQAPGFSYTDANKNK    | 39-53<br>39-55  | 39A<br>53T | 8.35  | 4 | 899.9332  | 2.83 | 826.900<br>963.955  | 2<br>2  | 0.8<br>0.7 | 902.45   |      |                     |         |            |
| KTGQAPGFSYTDANK<br>NKGITWGEETLMEYLENPKK | 39-53<br>54-73  | 39A<br>55T | 8.49  | 4 | 1038.2548 | 2.08 | 826.901<br>1240.599 | 2<br>2  | 2.0<br>2.9 | 1040.76  |      |                     |         |            |
| KTGQAPGFSYTDANK<br>GITWGEETLMEYLENPKK*  | 39-53<br>56-73  | 39A<br>72T | 17.37 | 4 | 981.715   | 0.71 | 826.899<br>1127.52* | 2<br>2* | 5.6<br>--  | 984.23   |      |                     |         |            |
| KTGQAPGFSYTDANK<br>KYIPGTK              | 39-53<br>73-79  | 39A<br>73T | 17.75 | 3 | 859.4291  | 0.11 | 826.900<br>906.477  | 2<br>1  | 0.8<br>1.8 | 862.78   |      |                     |         |            |
| KTGQAPGFSYTDANK<br>MIFAGIKK             | 39-53<br>80-87  | 39A<br>86T | 24.17 | 3 | 893.12    | 2.42 | 826.901<br>1007.540 | 2<br>1  | 2.0<br>2.3 | 896.4719 | 0.05 | 829.416<br>1012.573 | 2<br>1  | 1.1<br>0.0 |
| KTGQAPGFSYTDANK<br>KGER*                | 39-53<br>88-91  | 39A<br>88T | 23.26 | 3 | 753.6979  | 3.60 | 826.904<br>589.280* | 2<br>1* | 5.6<br>--  | 757.0514 | 2.58 | 829.419<br>594.311* | 2<br>1* | 4.7<br>--  |
| KTGQAPGFSYTDANK<br>EDLIAYLKK            | 39-53<br>92-100 | 39A<br>99T | 15.09 | 3 | 954.8138  | 3.93 | 826.898<br>1192.630 | 2<br>1  | 1.7<br>1.5 | 958.1652 | 2.08 | 829.414<br>1197.663 | 2<br>1  | 1.3<br>2.8 |
| KTGQAPGFSYTDANK<br>GEREDLIAYLKK         | 39-53<br>89-100 | 39A<br>99T | 15.09 | 4 | 801.65    |      |                     |         |            | 804.4185 | 2.67 | 829.418<br>770.418  | 2<br>2  | 3.5<br>2.6 |

|                                    |                  |             |       |   |           |      |                     |         |            |           |      |                     |         |            |
|------------------------------------|------------------|-------------|-------|---|-----------|------|---------------------|---------|------------|-----------|------|---------------------|---------|------------|
| KTGQAPGFSYTDANK<br>KATNE*          | 39-53<br>100-104 | 39T<br>100A | 18.01 | 3 | 778.0289  | 1.72 | 842.887<br>630.311* | 2<br>1* | 3.2<br>--  | 781.3847  | 0.26 | 845.402<br>635.344* | 2<br>1* | 4.8<br>--  |
| NKGITWGEETLMEYLENPK<br>KYIPGTK     | 54-72<br>73-79   | 55A<br>73T  | 11.62 | 3 | 1081.8712 | 0.63 | 1176.548<br>874.505 | 2<br>1  | 0.0<br>2.0 | 1085.2223 | 0.70 | 1179.064<br>879.534 | 2<br>1  | 0.3<br>0.8 |
| GITWGEETLMEYLENPKK<br>MIFAGIKK     | 56-73<br>80-87   | 72T<br>86A  | 13.65 | 3 | 1077.54   |      |                     |         |            | 1080.8999 | 0.86 | 1122.044<br>980.604 | 2<br>1  | 1.6<br>3.1 |
| GITWGEETLMEYLENPKK<br>M(ox)IFAGIKK | 56-73<br>80-87   | 72A<br>86T  | 13.65 | 3 | 1082.8778 | 1.80 | 1119.523<br>991.571 | 2<br>1  | 3.1<br>6.6 | 1086.23   |      |                     |         |            |
| KYIPGTK<br>M(ox)IFAGIKK            | 73-79<br>80-87   | 73A<br>86T  | 13.22 | 3 | 633.69    |      |                     |         |            | 637.0419  | 0.46 | 440.271<br>1012.574 | 2<br>1  | 0.1<br>1.0 |
| MIFAGIKK<br>KGER*                  | 80-87<br>88-91   | 86T<br>88A  | 6.41  | 4 | 396.2183  | 1.42 | 504.275<br>279.157* | 2<br>2* | 3.2<br>--  | 398.7339  | 1.18 | 506.790<br>281.672* | 2<br>2* | 5.9<br>--  |
| M(ox)IFAGIKK<br>KGER*              | 80-87<br>88-91   | 86T<br>88A  | 6.41  | 4 | 400.2177  |      |                     |         |            | 402.7331  | 2.34 | 514.787<br>281.673* | 2<br>2* | 4.9<br>--  |

All of the inter-linked peptides were identified by Batch-Tag, MS-Bridge, and LinkHunter. AA, amino acid; Mod., modification. MS3 m/z, m/z value of peptide sequenced in MS3.

\*Peptide fragments were not sequenced in MS3, but confirmed through characteristic fragment pairs and MS-Bridge mass matching.

Inter-linked peptides were not selected for MSn analysis, but displays the expected isotopic doublet pattern in MS1; the isotopic counterpart was identified in MS3.
