# Supplementary material
Source: PubMed Central journal article supplement (PMC3985771)
Supplement: ac403636b_si_003.pdf [file ac403636b_si_003.pdf]

## Supplementary Figure 1.

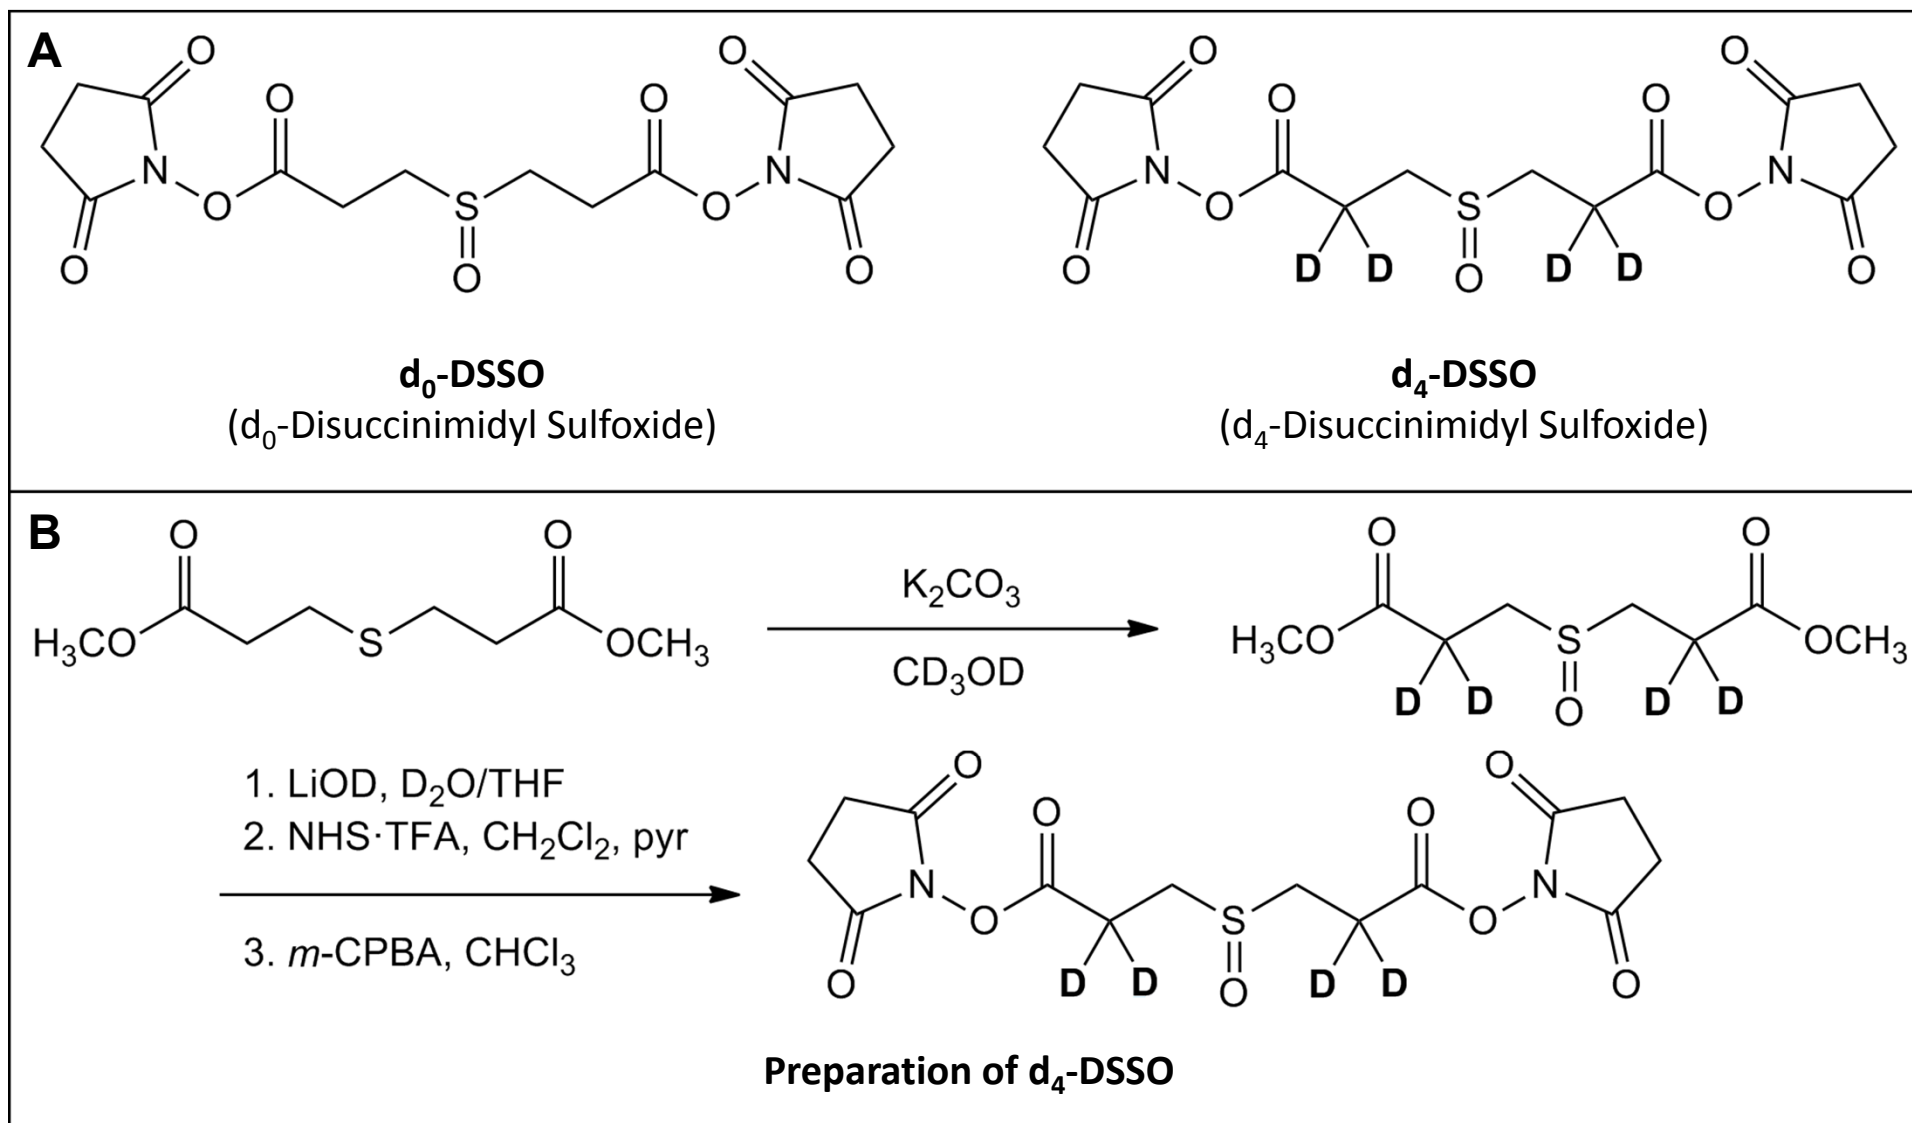

## Supplemental Figure 2.

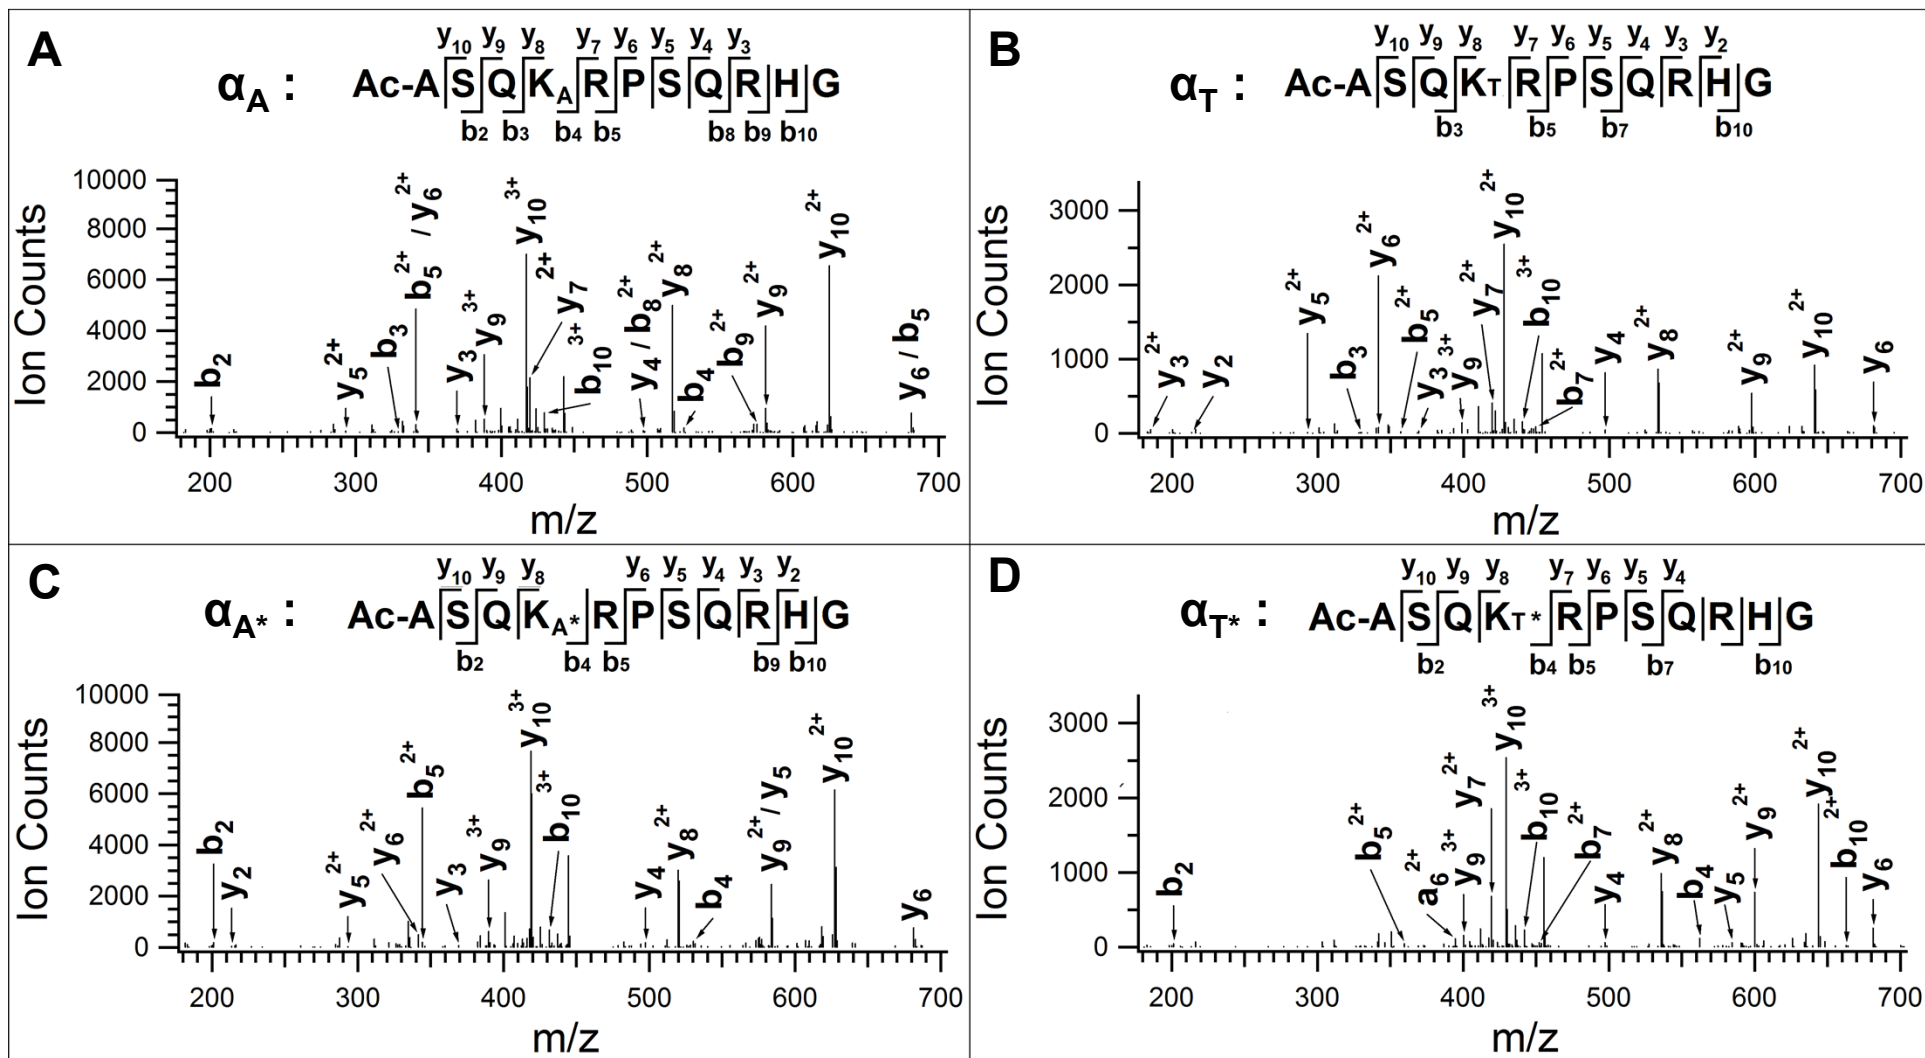

**Supplementary Figure 3.**

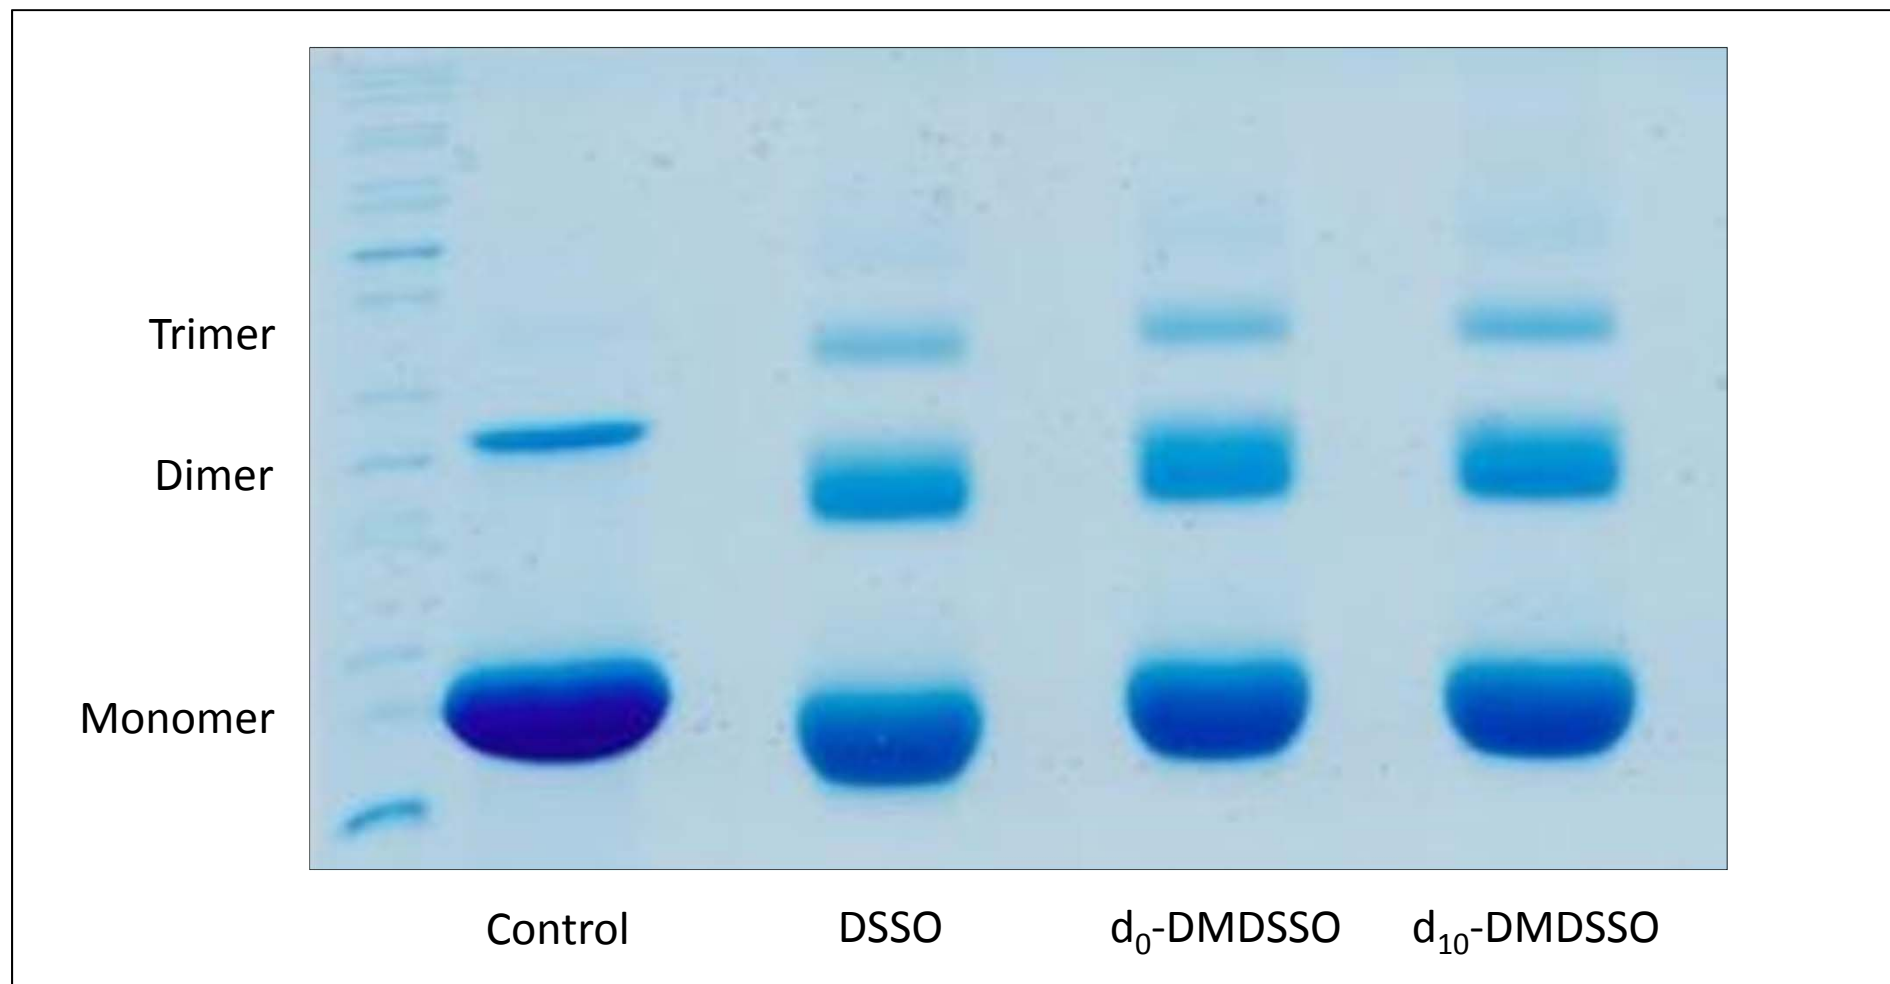

Supplementary Figure 4.

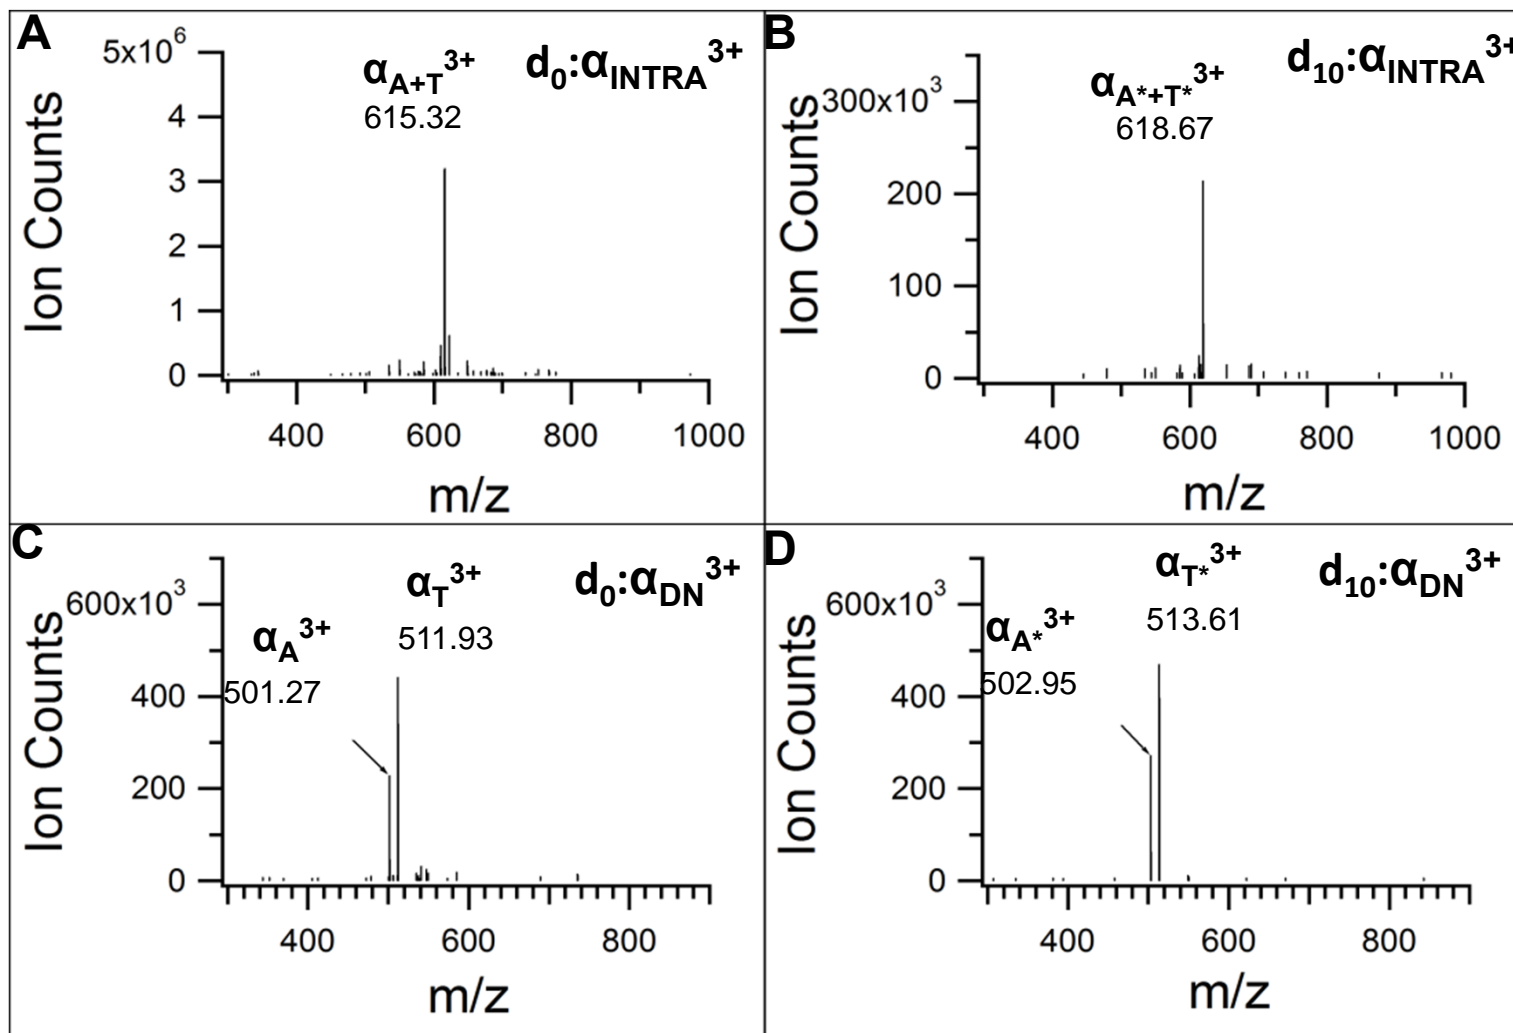

## Supplementary Figure 5.

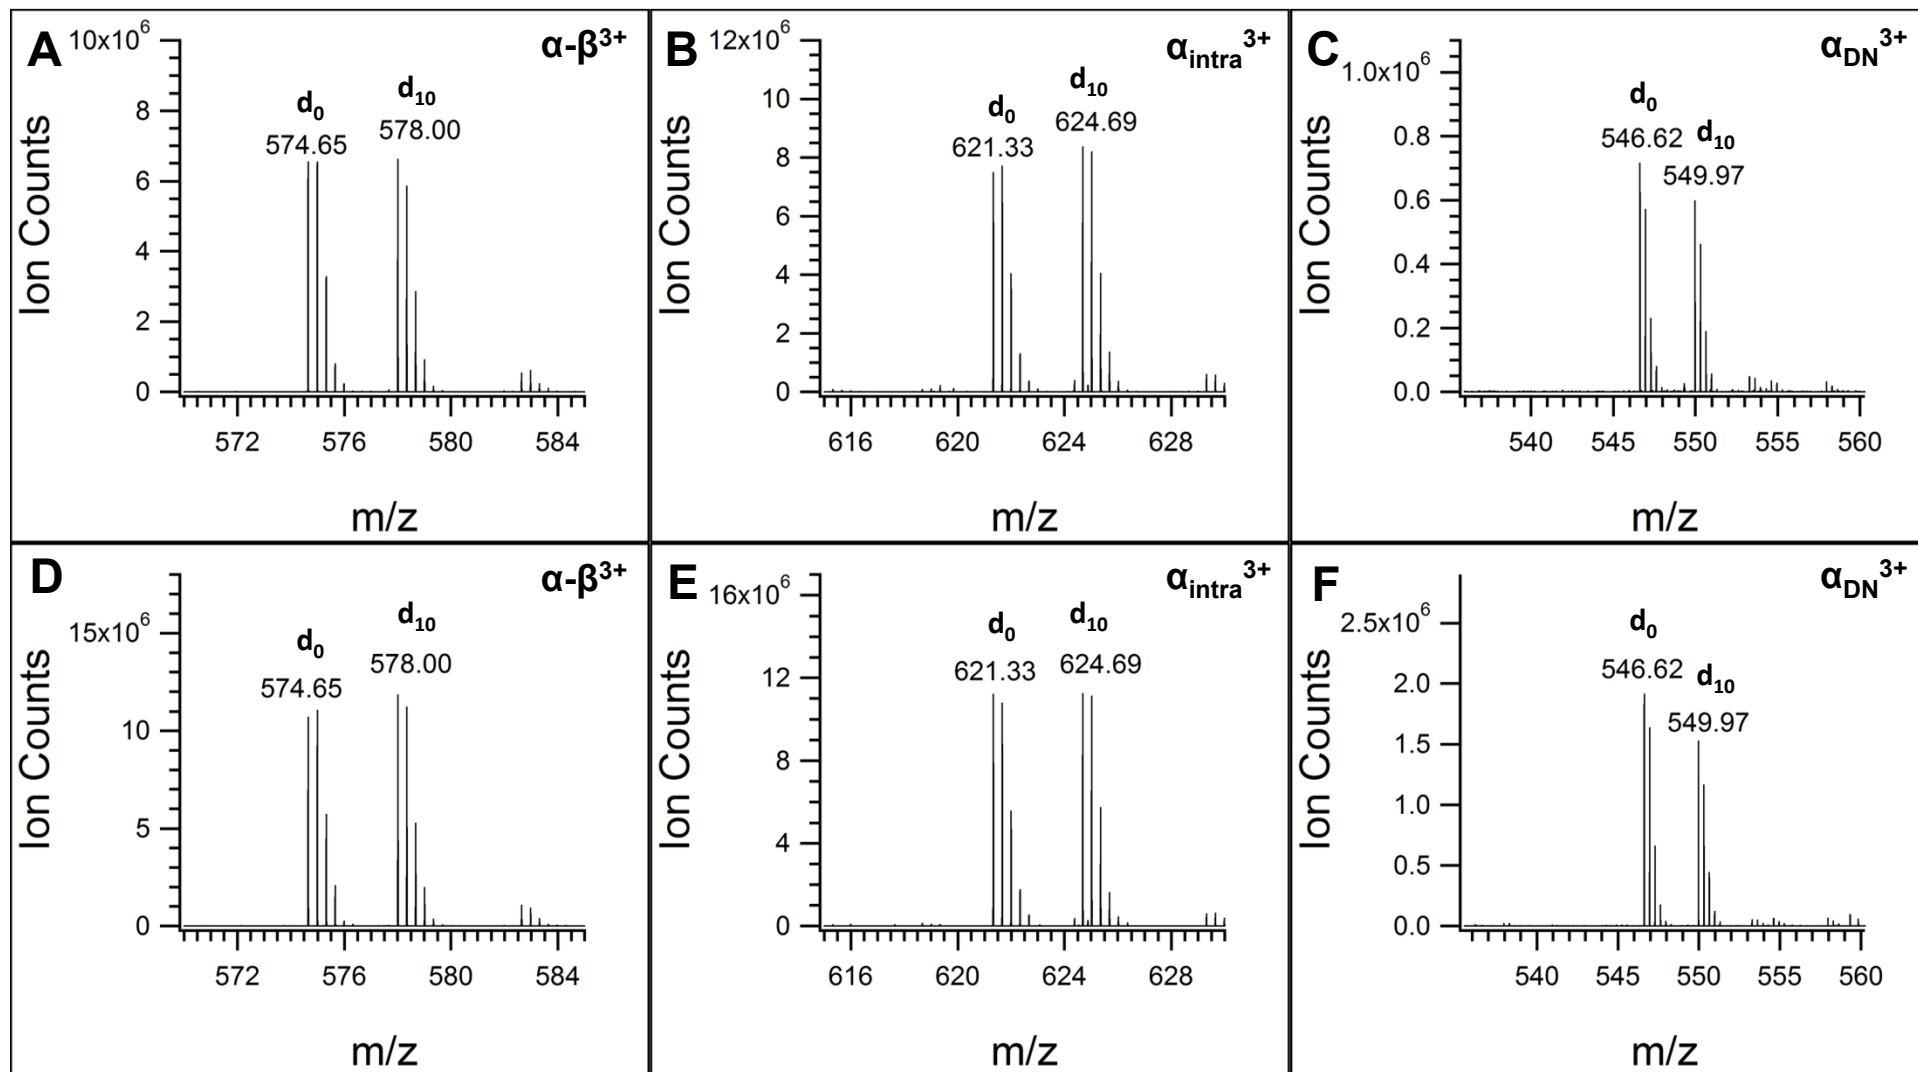

**Supplementary Figure 6.**

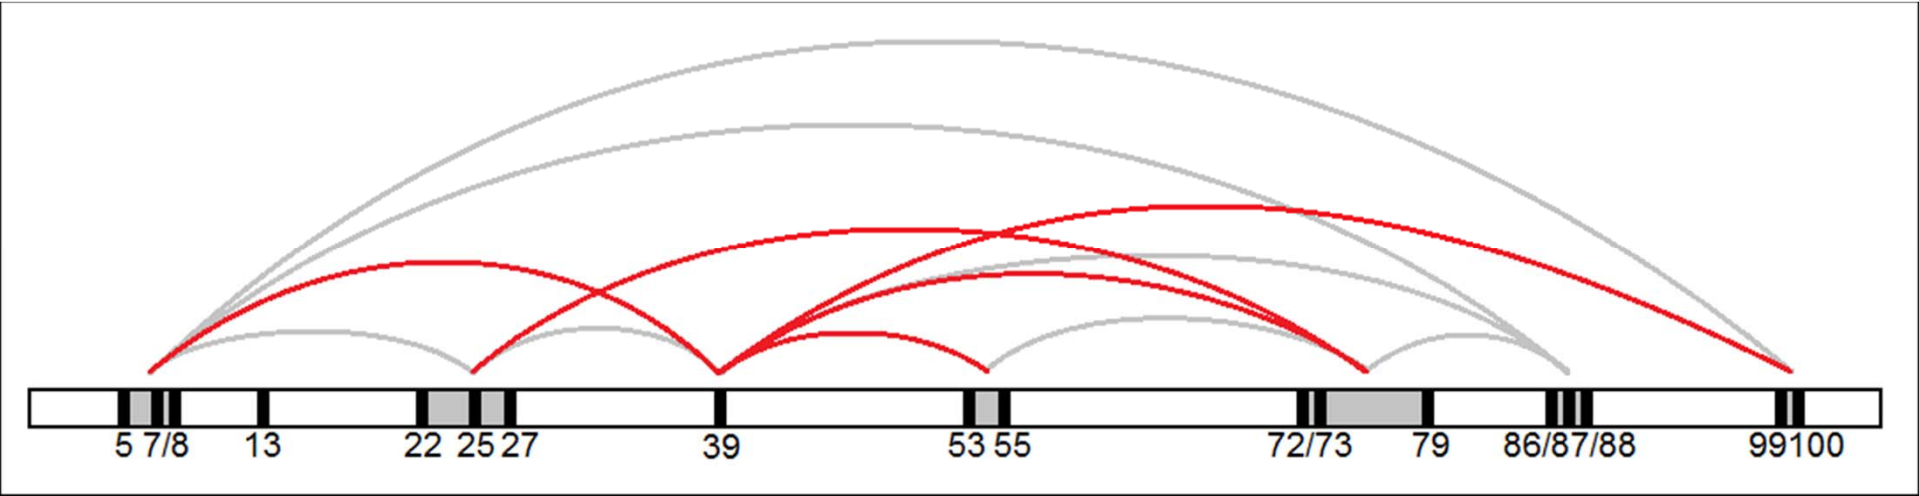

Supplemental Figure 7.

| Peptide Sequence | z | d0-dmDSSO |         |   | d10-dmDSSO |         |   |
|------------------|---|-----------|---------|---|------------|---------|---|
|                  |   | MS m/z    | MS2 m/z | z | MS m/z     | MS2 m/z | z |
| Ac-ASQKRPSQRHG   | 6 | 462.9033  | 454.57  | 3 | 464.5796   | 456.25  | 3 |
| Ac-ASQKRPSQRHG   |   |           | 465.23  | 3 |            | 466.91  | 3 |

Acetyl-ASQK(XL:C-Alkene)RPSQRHG<sup>+3</sup>

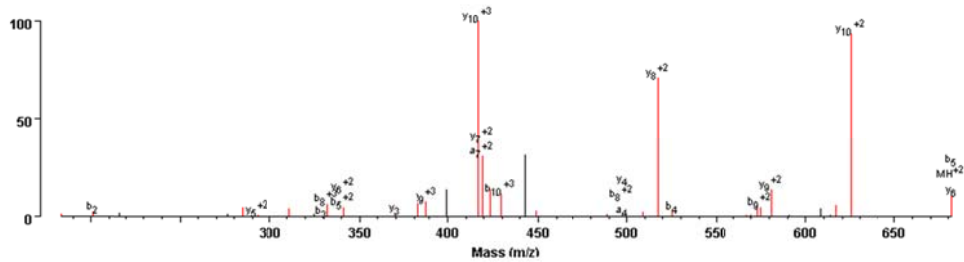

| m/z      | z | Ion Type    |
|----------|---|-------------|
| 183.158  | 1 | b-H2O,2,+1  |
| 201.033  | 1 | b,2,+1      |
| 284.6    | 1 | y-NH3,5,+2  |
| 293.194  | 1 | y,5,+2      |
| 311.247  | 1 | b-H2O,3,+1  |
| 329.038  | 1 | b,3,+1      |
| 332.222  | 1 | b-H2O,5,+2  |
|          |   | y-H2O,6,+2  |
|          |   | b,8,+3      |
|          |   | y-NH3,6,+2  |
|          |   | b-NH3,5,+2  |
| 341.193  | 1 | b,5,+2      |
|          |   | y,6,+2      |
| 369.299  | 1 | y,3,+1      |
| 382.171  | 1 | y-NH3,9,+3  |
|          |   | y-H2O,9,+3  |
| 388.151  | 1 | y,9,+3      |
| 417.002  | 1 | y,10,+3     |
| 419.512  | 1 | a,7,+2      |
|          |   | y,7,+2      |
| 4.24E+02 | 1 | b-NH3,10,+3 |
|          |   | b-H2O,10,+3 |
|          |   | b-H2O,7,+2  |
| 429.517  | 1 | b,10,+3     |
| 448.696  | 1 | MH-H2O,,+3  |

|         |   |             |
|---------|---|-------------|
|         |   | MH-NH3,,+3  |
| 489.158 | 1 | b-NH3,8,+2  |
| 497.351 | 1 | a,4,+1      |
|         |   | b,8,+2      |
|         |   | y,4,+1      |
| 509.111 | 1 | y-NH3,8,+2  |
| 517.444 | 1 | y,8,+2      |
| 525.331 | 1 | b,4,+1      |
| 567.255 | 1 | y-NH3,5,+1  |
|         |   | b-NH3,9,+2  |
| 573.167 | 1 | y-NH3,9,+2  |
| 575.271 | 1 | b,9,+2      |
| 581.162 | 1 | y,9,+2      |
| 616.551 | 1 | y-NH3,10,+2 |
| 625.088 | 1 | y,10,+2     |
| 681.321 | 1 | y,6,+1      |
|         |   | MH,,+2      |
|         |   | b,5,+1      |

**Acetyl-ASQK(XL:C-Thiol(Unsaturated))RPSQRHG<sup>+3</sup>**

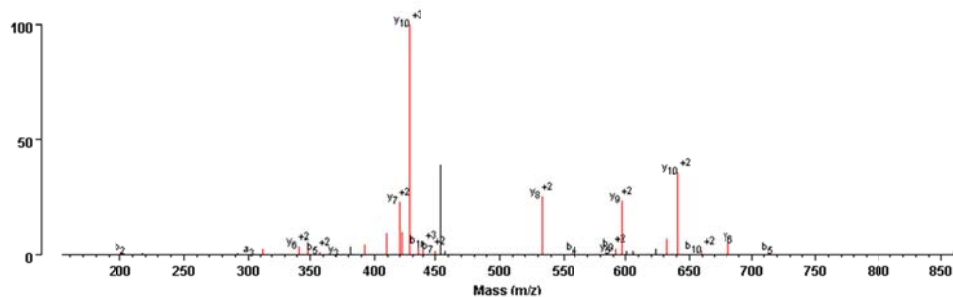

| m/z     | z | Ion Type   |
|---------|---|------------|
| 182.931 | 1 | b-H2O,2,+1 |
| 200.733 | 1 | b,2,+1     |
| 274.273 | 1 | y-NH3,7,+3 |
|         |   | y-H2O,7,+3 |
| 301.011 | 1 | a,3,+1     |
| 311.208 | 1 | b-H2O,3,+1 |
| 341.504 | 1 | y,6,+2     |
| 348.233 | 1 | b-H2O,5,+2 |
|         |   | b-NH3,5,+2 |
| 357.298 | 1 | b,5,+2     |
| 369.051 | 1 | y,3,+1     |
| 392.589 | 1 | y-H2O,9,+3 |
|         |   | y-NH3,9,+3 |



|         |   |             |
|---------|---|-------------|
| 409.865 | 1 | y-H2O,7,+2  |
| 419.392 | 1 | y,7,+2      |
| 421.88  | 1 | y-NH3,10,+3 |
|         |   | y-H2O,10,+3 |
| 427.767 | 1 | y,10,+3     |
| 434.543 | 1 | b-NH3,10,+3 |
|         |   | b-H2O,10,+3 |
| 440.043 | 1 | b-H2O,7,+2  |
|         |   | b,10,+3     |
| 449.261 | 1 | b,7,+2      |
| 533.253 | 1 | y,8,+2      |
| 557.197 | 1 | b,4,+1      |
| 584.534 | 1 | y,5,+1      |
| 591.708 | 1 | b,9,+2      |
| 597.472 | 1 | y,9,+2      |
| 631.954 | 1 | y-H2O,10,+2 |
|         |   | y-NH3,10,+2 |
| 640.69  | 1 | y,10,+2     |
| 659.806 | 1 | b,10,+2     |
| 681.332 | 1 | y,6,+1      |
| 713.38  | 1 | b,5,+1      |

**Acetyl-ASQK(XL:D-Alkene)RPSQRHG<sup>+3</sup>**

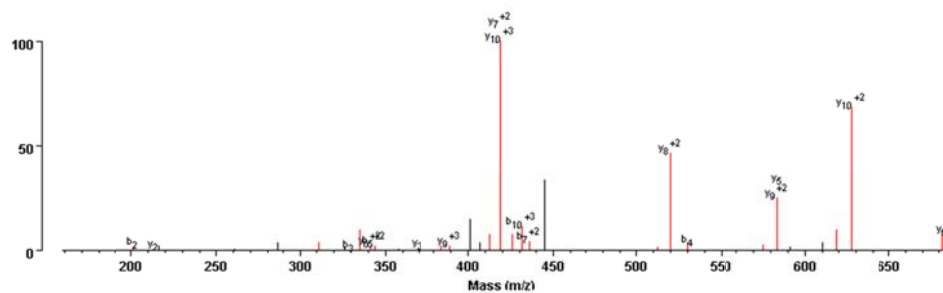

| m/z     | z | Ion Type   |
|---------|---|------------|
| 201.013 | 1 | b,2,+1     |
| 213.334 | 1 | y,2,+1     |
| 284.74  | 1 | b-H2O,7,+3 |
|         |   | b-NH3,7,+3 |
| 293.173 | 1 | y,5,+2     |
| 311.014 | 1 | b-H2O,3,+1 |
| 334.602 | 1 | b-H2O,5,+2 |
|         |   | b-NH3,5,+2 |
| 341.513 | 1 | y-NH3,8,+3 |
|         |   | y,6,+2     |

|         |   |             |
|---------|---|-------------|
| 344.185 | 1 | b,5,+2      |
| 369.144 | 1 | y,3,+1      |
| 383.962 | 1 | y-NH3,9,+3  |
|         |   | b-NH3,6,+2  |
|         |   | y-H2O,9,+3  |
| 389.608 | 1 | y,9,+3      |
| 418.683 | 1 | y,10,+3     |
|         |   | y,7,+2      |
| 425.184 | 1 | b-H2O,10,+3 |
|         |   | b-NH3,10,+3 |
| 431.27  | 1 | b,10,+3     |
| 436.951 | 1 | y-NH3,11,+3 |
| 497.319 | 1 | y,4,+1      |
| 512.038 | 1 | b-H2O,4,+1  |
| 519.794 | 1 | y,8,+2      |
| 530.268 | 1 | b,4,+1      |
| 575.702 | 1 | y-NH3,9,+2  |
| 583.843 | 1 | y,9,+2      |
|         |   | y,5,+1      |
| 618.289 | 1 | y-H2O,10,+2 |
|         |   | y-NH3,10,+2 |
| 627.27  | 1 | y,10,+2     |
| 681.37  | 1 | y,6,+1      |

**Acetyl-ASQK(XL:D-Thiol(Unsaturated))RPSQRHG<sup>+3</sup>**

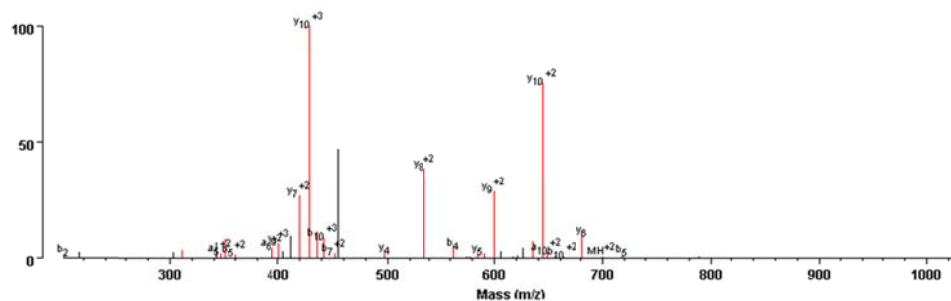

| m/z     | z | Ion Type   |
|---------|---|------------|
| 201.147 | 1 | b,2,+1     |
| 311.295 | 1 | b-H2O,3,+1 |
| 346.108 | 1 | a,5,+2     |
| 350.73  | 1 | b-H2O,5,+2 |
|         |   | b-NH3,5,+2 |
| 359.586 | 1 | b,5,+2     |
| 394.513 | 1 | y-NH3,9,+3 |
|         |   | a,6,+2     |

|          |   |                          |
|----------|---|--------------------------|
|          |   | y-H <sub>2</sub> O,9,+3  |
| 400.312  | 1 | y,9,+3                   |
| 419.351  | 1 | y,7,+2                   |
| 429.338  | 1 | y,10,+3                  |
| 435.929  | 1 | b-H <sub>2</sub> O,10,+3 |
|          |   | b-NH <sub>3</sub> ,10,+3 |
| 442.059  | 1 | b,10,+3                  |
| 452.101  | 1 | b,7,+2                   |
| 497.365  | 1 | y,4,+1                   |
| 535.83   | 1 | y,8,+2                   |
| 5.62E+02 | 1 | b,4,+1                   |
| 584.592  | 1 | b-H <sub>2</sub> O,9,+2  |
|          |   | y,5,+1                   |
| 590.692  | 1 | y-H <sub>2</sub> O,9,+2  |
| 600.084  | 1 | y,9,+2                   |
| 635.036  | 1 | y-NH <sub>3</sub> ,10,+2 |
| 643.7    | 1 | y,10,+2                  |
| 648.27   | 1 | a,10,+2                  |
| 662.877  | 1 | y-H <sub>2</sub> O,6,+1  |
|          |   | b,10,+2                  |
| 681.212  | 1 | y,6,+1                   |
| 700.193  | 1 | b-H <sub>2</sub> O,5,+1  |
|          |   | MH,,+2                   |
| 718.404  | 1 | b,5,+1                   |

| Peptide Sequence | z | d0-dmDSSO |         |   | d10-dmDSSO |         |   |
|------------------|---|-----------|---------|---|------------|---------|---|
|                  |   | MS m/z    | MS2 m/z | z | MS m/z     | MS2 m/z | z |
| GGKHKTGPNLHGLFGR | 3 | 621.32    | 615.32  | 3 | 624.675    | 618.67  | 3 |

GGK(XL:C-Alkene)HK(XL:C-Thiol(Unsaturated))TGPLNHGLFGR<sup>+3</sup>

GGK(XL:C-Thiol(Unsaturated))HK(XL:C-Alkene)TGPLNHGLFGR<sup>+3</sup>

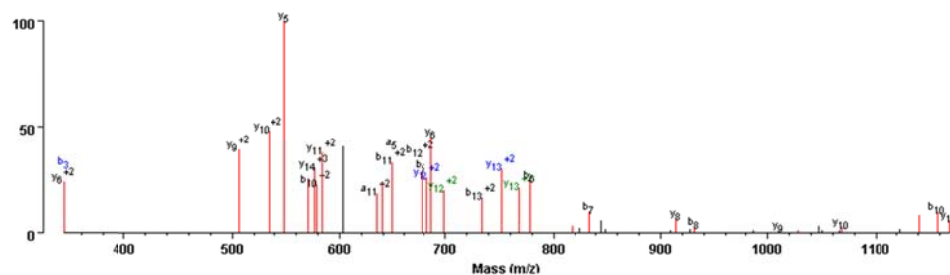

| m/z     | z | Peptide # | Ion Type    |
|---------|---|-----------|-------------|
| 343.609 | 1 | All       | y,6,+2      |
|         |   | All       | b-NH3,9,+3  |
|         |   | All       | b-H2O,9,+3  |
|         |   | 2         | b,3,+1      |
| 505.951 | 1 | 1         | y-H2O,13,+3 |
|         |   | All       | y,9,+2      |
|         |   | 1         | y-NH3,13,+3 |
| 534.456 | 1 | All       | y,10,+2     |
| 549.237 | 1 | All       | y,5,+1      |
| 571.514 | 1 | All       | y-NH3,14,+3 |
|         |   | All       | y-H2O,14,+3 |
|         |   | All       | b-NH3,10,+2 |
| 577.422 | 1 | All       | y,14,+3     |
| 579.699 | 1 | All       | b,10,+2     |
| 584.633 | 1 | All       | y,11,+2     |
| 634.526 | 1 | All       | a,11,+2     |
| 639.554 | 1 | All       | b-H2O,11,+2 |
|         |   | All       | b-NH3,11,+2 |
| 648.282 | 1 | All       | b,11,+2     |
|         |   | All       | a,5,+1      |
| 676.393 | 1 | All       | b,5,+1      |
|         |   | All       | b,12,+2     |
| 682.959 | 1 | 2         | y,12,+2     |
| 686.232 | 1 | All       | y,6,+1      |

|         |   |     |             |
|---------|---|-----|-------------|
| 699.017 | 1 | 1   | y,12,+2     |
| 733.594 | 1 | All | b,13,+2     |
| 751.583 | 1 | 2   | y,13,+2     |
| 767.456 | 1 | 1   | y,13,+2     |
| 777.247 | 1 | All | b,6,+1      |
| 816.307 | 1 | All | b-H2O,7,+1  |
| 834.126 | 1 | All | b,7,+1      |
| 913.319 | 1 | All | b-H2O,8,+1  |
|         |   | All | MH-H2O,,+2  |
|         |   | All | y,8,+1      |
| 931.323 | 1 | All | b,8,+1      |
| 1010.27 | 1 | All | y,9,+1      |
| 1027.53 | 1 | All | b-H2O,9,+1  |
| 1067.78 | 1 | All | y,10,+1     |
| 1140.63 | 1 | All | b-H2O,10,+1 |
| 1158.31 | 1 | All | b,10,+1     |
| 1168.63 | 1 | All | y,11,+1     |

**GGK(XL:D-Alkene)HK(XL:D-Thiol(Unsaturated))TGPLHGLFGR<sup>+3</sup>**

**GGK(XL:D-Thiol(Unsaturated))HK(XL:D-Alkene)TGPLHGLFGR<sup>+3</sup>**

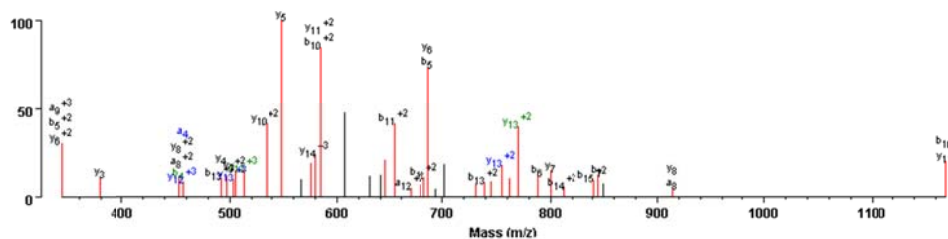

| m/z     | z | Peptide # | Ion Type    |
|---------|---|-----------|-------------|
| 343.645 | 1 | All       | y,6,+2      |
|         |   | All       | b,5,+2      |
|         |   | All       | a,9,+3      |
| 379.229 | 1 | All       | y,3,+1      |
| 453.511 | 1 | 1         | b,4,+1      |
| 457.415 | 1 | All       | a,8,+2      |
|         |   | All       | y,8,+2      |
|         |   | 2         | y,12,+3     |
|         |   | 2         | a,4,+1      |
| 492.492 | 1 | All       | b,13,+3     |
|         |   | All       | y,4,+1      |
| 497.135 | 1 | All       | y-NH3,9,+2  |
|         |   | 2         | y-NH3,13,+3 |

|         |   |     |                          |
|---------|---|-----|--------------------------|
|         |   | 2   | y-H <sub>2</sub> O,13,+3 |
| 503.019 | 1 | 2   | y,13,+3                  |
| 505.61  | 1 | All | y,9,+2                   |
| 513.67  | 1 | 1   | y,13,+3                  |
| 534.53  | 1 | All | y,10,+2                  |
| 549.244 | 1 | All | y,5,+1                   |
| 576.634 | 1 | All | b-NH <sub>3</sub> ,10,+2 |
|         |   | All | y-NH <sub>3</sub> ,11,+2 |
| 580.775 | 1 | All | y,14,+3                  |
| 585.002 | 1 | All | b,10,+2                  |
|         |   | All | y,11,+2                  |
| 644.456 | 1 | All | b-H <sub>2</sub> O,11,+2 |
|         |   | All | b-NH <sub>3</sub> ,11,+2 |
| 653.406 | 1 | All | b,11,+2                  |
| 668.087 | 1 | All | a,12,+2                  |
| 677.228 | 1 | 2   | y-NH <sub>3</sub> ,12,+2 |
| 682.071 | 1 | All | b,12,+2                  |
| 686.479 | 1 | All | b,5,+1                   |
|         |   | All | y,6,+1                   |
| 730.19  | 1 | All | b-NH <sub>3</sub> ,13,+2 |
| 738.249 | 1 | All | b,13,+2                  |
| 744.791 | 1 | 2   | y-H <sub>2</sub> O,13,+2 |
| 754.133 | 1 | 2   | y,13,+2                  |
| 761.861 | 1 | 1   | y-NH <sub>3</sub> ,13,+2 |
| 769.853 | 1 | 1   | y,13,+2                  |
|         |   | All | b-H <sub>2</sub> O,6,+1  |
|         |   | All | b-NH <sub>3</sub> ,6,+1  |
| 787.397 | 1 | All | b,6,+1                   |
| 799.443 | 1 | All | y,7,+1                   |
| 812.03  | 1 | All | b,14,+2                  |
| 840.666 | 1 | All | b,15,+2                  |
| 844.47  | 1 | All | b,7,+1                   |
| 913.638 | 1 | All | a,8,+1                   |
|         |   | All | y,8,+1                   |
| 1168.6  | 1 | All | y,11,+1                  |
|         |   | All | b,10,+1                  |

| Peptide Sequence | d0-dmDSSO |          |         | d10-dmDSSO |          |         |   |
|------------------|-----------|----------|---------|------------|----------|---------|---|
|                  | z         | MS m/z   | MS2 m/z | z          | MS m/z   | MS2 m/z | z |
| KHKTGPNLHGLFGR   | 3         | 546.6116 | 501.27  | 3          | 549.9661 | 502.95  | 3 |
|                  |           |          | 511.93  | 3          |          | 513.61  | 3 |

**HK(XL:C-Alkene)TGPLNHGLFGR<sup>+3</sup>**

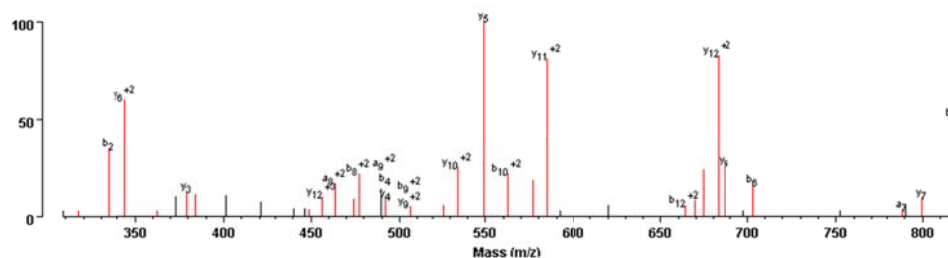

| m/z     | z | Ion Type    |
|---------|---|-------------|
| 317.183 | 1 | b-NH3,2,+1  |
| 334.178 | 1 | b,2,+1      |
| 343.815 | 1 | y,6,+2      |
|         |   | b-NH3,6,+2  |
| 362.356 | 1 | y-NH3,3,+1  |
| 379.286 | 1 | y,3,+1      |
| 383.704 | 1 | y-H2O,11,+3 |
| 449.239 | 1 | y-H2O,12,+3 |
|         |   | y-NH3,8,+2  |
| 456.155 | 1 | y,12,+3     |
| 463.628 | 1 | a,8,+2      |
| 474.368 | 1 | b-H2O,4,+1  |
| 477.109 | 1 | b,8,+2      |
| 492.302 | 1 | y,4,+1      |
|         |   | b,4,+1      |
|         |   | a,9,+2      |
| 506.021 | 1 | y,9,+2      |
|         |   | b,9,+2      |
| 526.141 | 1 | y-NH3,10,+2 |
| 534.51  | 1 | y,10,+2     |
| 549.359 | 1 | y,5,+1      |
| 562.434 | 1 | b,10,+2     |
| 576.512 | 1 | y-NH3,11,+2 |
| 584.886 | 1 | y,11,+2     |

|         |   |             |
|---------|---|-------------|
| 663.862 | 1 | b,12,+2     |
| 669.182 | 1 | y-NH3,6,+1  |
| 674.555 | 1 | y-NH3,12,+2 |
| 683.104 | 1 | y,12,+2     |
| 686.405 | 1 | y,6,+1      |
|         |   | b-NH3,6,+1  |
| 703.333 | 1 | b,6,+1      |
| 788.438 | 1 | a,7,+1      |
| 799.248 | 1 | b-NH3,7,+1  |
|         |   | y,7,+1      |
| 816.396 | 1 | b,7,+1      |

**HK(XL:C-Thiol(Unsaturated))TGPLHGLFGR<sup>+3</sup>**

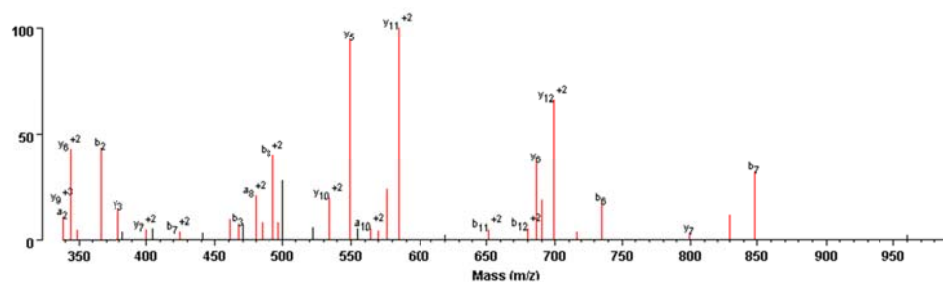

| m/z     | z | Ion Type    |
|---------|---|-------------|
| 338.084 | 1 | a,2,+1      |
|         |   | y,9,+3      |
| 343.846 | 1 | y,6,+2      |
| 348.873 | 1 | b-NH3,2,+1  |
| 366.078 | 1 | b,2,+1      |
| 379.29  | 1 | y,3,+1      |
|         |   | b-H2O,10,+3 |
| 400.177 | 1 | y,7,+2      |
| 424.612 | 1 | b,7,+2      |
| 460.451 | 1 | y-NH3,12,+3 |
|         |   | y-H2O,12,+3 |
| 466.861 | 1 | b,3,+1      |
| 479.382 | 1 | a,8,+2      |
| 484.542 | 1 | b-NH3,8,+2  |
|         |   | b-H2O,8,+2  |
| 493.398 | 1 | b,8,+2      |
| 497.404 | 1 | y-NH3,9,+2  |
| 534.352 | 1 | y,10,+2     |
| 549.365 | 1 | y,5,+1      |
| 564.171 | 1 | a,10,+2     |



|         |   |                          |
|---------|---|--------------------------|
| 569.34  | 1 | b-H <sub>2</sub> O,10,+2 |
|         |   | b-NH <sub>3</sub> ,10,+2 |
| 575.842 | 1 | y-H <sub>2</sub> O,11,+2 |
|         |   | y-NH <sub>3</sub> ,11,+2 |
| 584.97  | 1 | y,11,+2                  |
| 652     | 1 | b,11,+2                  |
| 680.255 | 1 | b,12,+2                  |
| 686.293 | 1 | y,6,+1                   |
| 689.996 | 1 | y-H <sub>2</sub> O,12,+2 |
|         |   | y-NH <sub>3</sub> ,12,+2 |
| 699.095 | 1 | y,12,+2                  |
| 716.975 | 1 | b-H <sub>2</sub> O,6,+1  |
| 735.336 | 1 | b,6,+1                   |
| 799.453 | 1 | y,7,+1                   |
| 830.341 | 1 | b-H <sub>2</sub> O,7,+1  |
| 848.229 | 1 | b,7,+1                   |

**HK(XL:D-Alkene)TGPLHGLFGR<sup>+3</sup>**

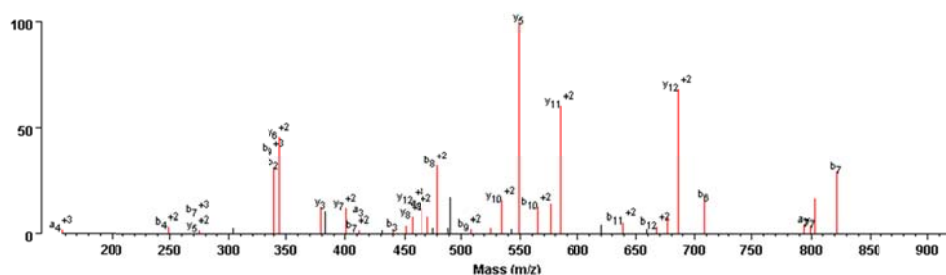

| m/z     | z | Ion Type                 |
|---------|---|--------------------------|
| 157.165 | 1 | a,4,+3                   |
| 249.431 | 1 | b,4,+2                   |
| 275.033 | 1 | y,5,+2                   |
|         |   | b,7,+3                   |
| 339.212 | 1 | b,2,+1                   |
|         |   | b,9,+3                   |
| 343.845 | 1 | y,6,+2                   |
| 379.194 | 1 | y,3,+1                   |
| 400.349 | 1 | y,7,+2                   |
| 411.688 | 1 | b,7,+2                   |
|         |   | a,3,+1                   |
| 440.007 | 1 | b,3,+1                   |
| 451.34  | 1 | y-H <sub>2</sub> O,12,+3 |
|         |   | y-NH <sub>3</sub> ,12,+3 |
| 457.124 | 1 | y,8,+2                   |

|         |   |             |
|---------|---|-------------|
|         |   | y,12,+3     |
| 465.693 | 1 | a,8,+2      |
| 471.695 | 1 | b-NH3,8,+2  |
| 479.796 | 1 | b,8,+2      |
|         |   | b-NH3,4,+1  |
|         |   | b-H2O,4,+1  |
| 508.742 | 1 | b,9,+2      |
| 525.61  | 1 | y-NH3,10,+2 |
| 534.384 | 1 | y,10,+2     |
| 549.286 | 1 | y,5,+1      |
| 564.925 | 1 | b,10,+2     |
| 576.157 | 1 | y-NH3,11,+2 |
|         |   | b-H2O,5,+1  |
|         |   | y-H2O,11,+2 |
| 584.731 | 1 | y,11,+2     |
| 638.453 | 1 | b,11,+2     |
| 667.331 | 1 | b,12,+2     |
| 676.508 | 1 | y-H2O,12,+2 |
|         |   | y-NH3,12,+2 |
| 685.712 | 1 | y,12,+2     |
| 708.229 | 1 | b,6,+1      |
| 793.695 | 1 | a,7,+1      |
| 799.633 | 1 | y,7,+1      |
| 803.335 | 1 | b-H2O,7,+1  |
| 821.391 | 1 | b,7,+1      |

**HK(XL:D-Thiol(Unsaturated))TGPLNHGLFGR<sup>+3</sup>**

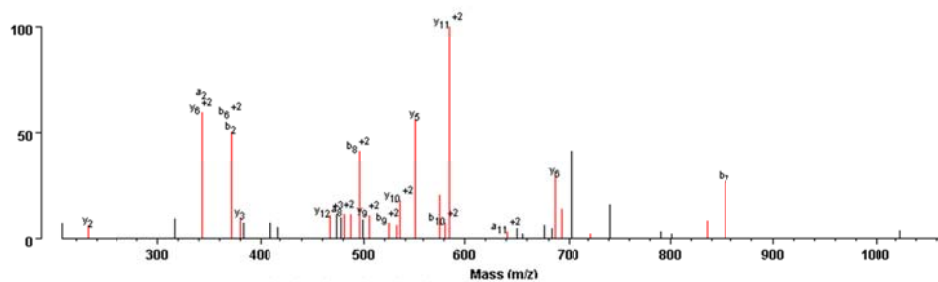

| m/z     | z | Ion Type   |
|---------|---|------------|
| 232.055 | 1 | y,2,+1     |
| 343.56  | 1 | y,6,+2     |
|         |   | b-H2O,9,+3 |
|         |   | a,2,+1     |
| 371.256 | 1 | b,2,+1     |
|         |   | b,6,+2     |

|         |   |             |
|---------|---|-------------|
| 379.419 | 1 | y,3,+1      |
| 468.227 | 1 | y,12,+3     |
| 481.752 | 1 | a,8,+2      |
| 487.501 | 1 | b-NH3,8,+2  |
| 495.987 | 1 | b,8,+2      |
| 505.859 | 1 | y,9,+2      |
| 524.305 | 1 | b,9,+2      |
| 531.689 | 1 | y-NH3,5,+1  |
| 534.703 | 1 | y,10,+2     |
| 549.186 | 1 | y,5,+1      |
| 575.77  | 1 | y-H2O,11,+2 |
|         |   | y-NH3,11,+2 |
| 581.286 | 1 | b,10,+2     |
| 584.92  | 1 | y,11,+2     |
| 640.479 | 1 | a,11,+2     |
| 686.527 | 1 | y,6,+1      |
| 692.755 | 1 | y-NH3,12,+2 |
|         |   | y-H2O,12,+2 |
| 722.353 | 1 | b-H2O,6,+1  |
| 835.51  | 1 | b-H2O,7,+1  |
| 853.275 | 1 | b,7,+1      |

| Peptide Sequence      | z | d0-dmDSSO |         | d10-dmDSSO |          |         |   |
|-----------------------|---|-----------|---------|------------|----------|---------|---|
|                       |   | MS m/z    | MS2 m/z | z          | MS m/z   | MS2 m/z | z |
| Ac-GDVEK GK<br>KIFVQK | 3 | 574.6436  | 874.400 | 1          | 577.9993 | 879.430 | 1 |
|                       |   |           | 415.761 | 2          |          | 418.277 | 2 |

**M(Met-loss+Acetyl)GDVEK(XL:C-Thiol(Unsaturated))GK**

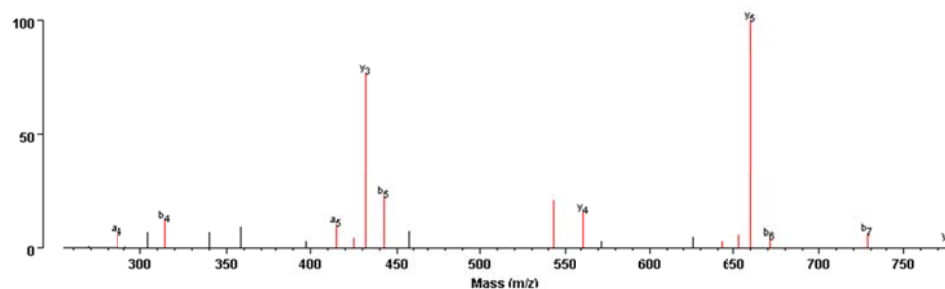

| m/z     | z | Ion Type   |
|---------|---|------------|
| 285.954 | 1 | a,4,+1     |
| 314.235 | 1 | b,4,+1     |
| 415.123 | 1 | a,5,+1     |
|         |   | y-NH3,3,+1 |
| 425.308 | 1 | b-H2O,5,+1 |
| 432.311 | 1 | y,3,+1     |
| 442.926 | 1 | b,5,+1     |
| 543.166 | 1 | y-H2O,4,+1 |
| 561.293 | 1 | y,4,+1     |
| 642.202 | 1 | y-H2O,5,+1 |
| 653.099 | 1 | b-H2O,6,+1 |
| 660.178 | 1 | y,5,+1     |
| 671.194 | 1 | b,6,+1     |
| 728.104 | 1 | b,7,+1     |
| 775.584 | 1 | y,6,+1     |

**K(XL:C-Alkene)IFVQK<sup>+2</sup>**

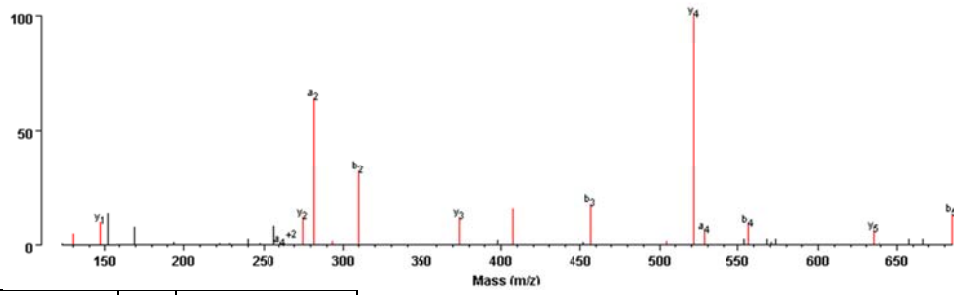

| m/z     | z | Ion Type   |
|---------|---|------------|
| 130.132 | 1 | y-NH3,1,+1 |
|         |   | y-NH3,2,+2 |
| 147.217 | 1 | y,1,+1     |
|         |   | b-NH3,2,+2 |
| 265.206 | 1 | a,4,+2     |
| 275.223 | 1 | y,2,+1     |
| 282.257 | 1 | a,2,+1     |
| 293.466 | 1 | b-NH3,2,+1 |
| 310.102 | 1 | b,2,+1     |
| 374.241 | 1 | y,3,+1     |
| 407.256 | 1 | MH-NH3,,+2 |
| 457.132 | 1 | b,3,+1     |
| 504.277 | 1 | y-NH3,4,+1 |
| 521.321 | 1 | y,4,+1     |
| 528.024 | 1 | a,4,+1     |

| Peptide Sequence               | z | d0-dmDSSO |         |   | d10-dmDSSO |         |   |
|--------------------------------|---|-----------|---------|---|------------|---------|---|
|                                |   | MS m/z    | MS2 m/z | z | MS m/z     | MS2 m/z | z |
| Ac-GDVEK GK<br>KTGQAPGFSYTDANK | 3 | 848.7386  | 874.400 | 1 | 852.0922   | 879.429 | 1 |
|                                |   |           | 826.901 | 2 |            | 829.416 | 2 |

**M(Met-loss+Acetyl)GDVEK(XL:D-Thiol(Unsaturated))GK**

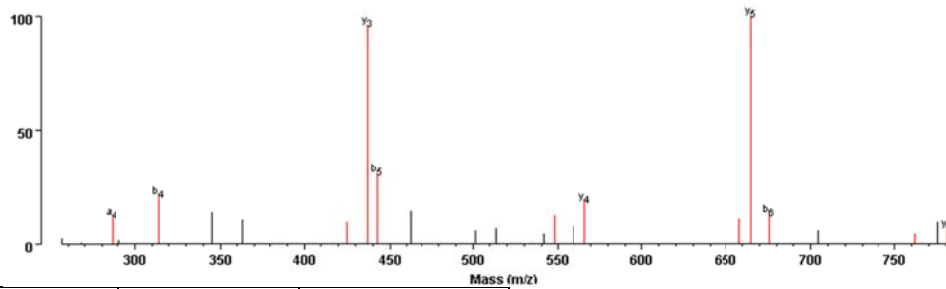

| m/z     | z | Ion Type   |
|---------|---|------------|
| 286     | 1 | a,4,+1     |
| 313.803 | 1 | b,4,+1     |
| 425.066 | 1 | b-H2O,5,+1 |
| 437.285 | 1 | y,3,+1     |
| 443     | 1 | b,5,+1     |
| 548     | 1 | y-H2O,4,+1 |
| 566.182 | 1 | y,4,+1     |
| 658.288 | 1 | b-H2O,6,+1 |
| 665.28  | 1 | y,5,+1     |
| 676     | 1 | b,6,+1     |
| 762     | 1 | y-H2O,6,+1 |
| 780.626 | 1 | y,6,+1     |

**K(XL:D-Alkene)TGQAPGFSYTDANK<sup>+2</sup>**

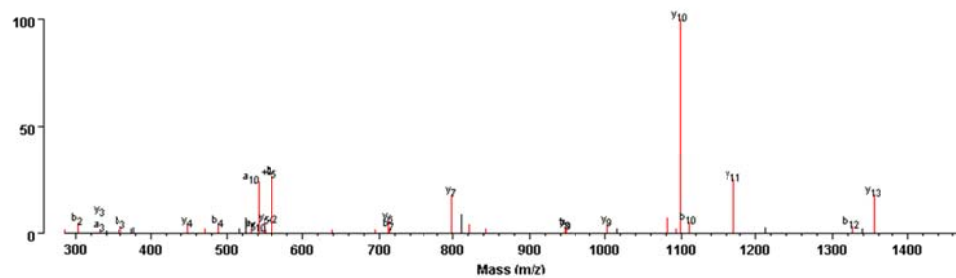

| m/z     | z | Ion Type                 |
|---------|---|--------------------------|
| 285.064 | 1 | b-H <sub>2</sub> O,2,+1  |
| 303.176 | 1 | b,2,+1                   |
| 332.235 | 1 | a,3,+1                   |
|         |   | y,3,+1                   |
| 360.221 | 1 | b,3,+1                   |
| 447.191 | 1 | y,4,+1                   |
| 470.325 | 1 | b-H <sub>2</sub> O,4,+1  |
| 488.202 | 1 | b,4,+1                   |
| 531.407 | 1 | a,5,+1                   |
|         |   | y-NH <sub>3</sub> ,5,+1  |
| 541.425 | 1 | b-H <sub>2</sub> O,5,+1  |
|         |   | y-H <sub>2</sub> O,10,+2 |
|         |   | y-NH <sub>3</sub> ,10,+2 |
|         |   | a,10,+2                  |
| 548.206 | 1 | y,5,+1                   |
| 550.349 | 1 | y,10,+2                  |
| 559.111 | 1 | b,5,+1                   |
| 638.227 | 1 | b-H <sub>2</sub> O,6,+1  |
| 694.964 | 1 | b-H <sub>2</sub> O,7,+1  |
| 711.248 | 1 | y,6,+1                   |
| 713.467 | 1 | b,7,+1                   |
| 798.186 | 1 | y,7,+1                   |
| 820.278 | 1 | MH-H <sub>2</sub> O,,+2  |
| 842.332 | 1 | b-H <sub>2</sub> O,8,+1  |
| 945.175 | 1 | y,8,+1                   |
| 947.328 | 1 | b,9,+1                   |
| 1002.5  | 1 | y,9,+1                   |
| 1081.48 | 1 | y-H <sub>2</sub> O,10,+1 |
| 1093.63 | 1 | b-NH <sub>3</sub> ,10,+1 |
| 1099.28 | 1 | y,10,+1                  |

|         |   |         |
|---------|---|---------|
| 1110.42 | 1 | b,10,+1 |
| 1170.4  | 1 | y,11,+1 |
| 1326.51 | 1 | b,12,+1 |
| 1355.18 | 1 | y,13,+1 |

| Peptide Sequence     | z | d0-dmDSSO |         |   | d10-dmDSSO |         |   |
|----------------------|---|-----------|---------|---|------------|---------|---|
|                      |   | MS m/z    | MS2 m/z | z | MS m/z     | MS2 m/z | z |
| Ac-GDVEK GK<br>KKGER | 3 | 526.2721  | 874.398 | 1 | 529.6268   | 879.429 | 1 |
|                      |   |           | 343.204 | 2 |            | 345.720 | 2 |

**M(Met-loss+Acetyl)GDVEK(XL:C-Thiol(Unsaturated))GK**

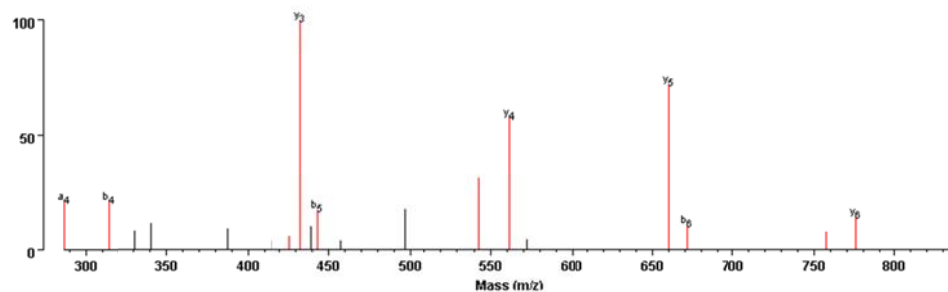

| m/z     | z | Ion Type                |
|---------|---|-------------------------|
| 286.08  | 1 | a,4,+1                  |
| 314.054 | 1 | b,4,+1                  |
| 425.443 | 1 | b-H <sub>2</sub> O,5,+1 |
| 432.188 | 1 | y,3,+1                  |
| 443.169 | 1 | b,5,+1                  |
| 543.2   | 1 | y-H <sub>2</sub> O,4,+1 |
| 561.48  | 1 | y,4,+1                  |
| 660.249 | 1 | y,5,+1                  |
| 671.484 | 1 | b,6,+1                  |
| 757.691 | 1 | y-H <sub>2</sub> O,6,+1 |
| 775.381 | 1 | y,6,+1                  |



**K(XL:C-Alkene)KGER<sup>+2</sup>**

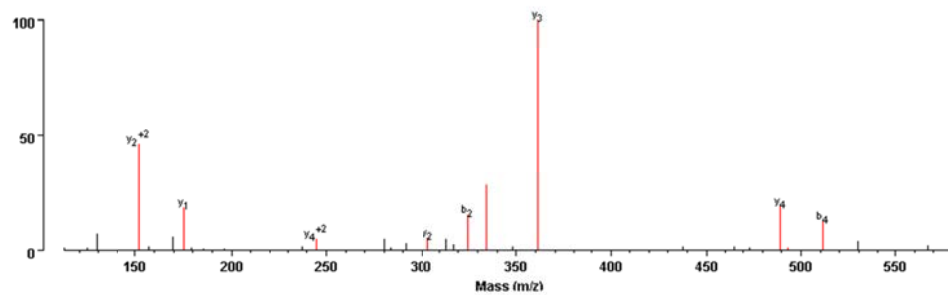

| m/z     | z | Ion Type                |
|---------|---|-------------------------|
| 152.172 | 1 | y <sub>2</sub> ,+2      |
| 175.112 | 1 | y <sub>1</sub> ,+1      |
| 245.14  | 1 | y <sub>4</sub> ,+2      |
| 304.131 | 1 | y <sub>2</sub> ,+1      |
| 325.125 | 1 | b <sub>2</sub> ,+1      |
| 334.426 | 1 | MH-H <sub>2</sub> O,,+2 |
|         |   | MH-NH <sub>3</sub> ,,+2 |
| 361.283 | 1 | y <sub>3</sub> ,+1      |
| 489.272 | 1 | y <sub>4</sub> ,+1      |
| 493.482 | 1 | b-H <sub>2</sub> O,4,+1 |
| 511.371 | 1 | b <sub>4</sub> ,+1      |

| Peptide Sequence | z | d0-dmDSSO |         |   | d10-dmDSSO |         |   |
|------------------|---|-----------|---------|---|------------|---------|---|
|                  |   | MS m/z    | MS2 m/z | z | MS m/z     | MS2 m/z | z |
| Ac-GDVEK GK      | 4 | 631.335   | 874.399 | 1 | 633.8503   | 879.427 | 1 |
| KKGEREDLIAYLK    |   |           | 544.311 | 3 |            | 545.988 | 3 |

**M(Met-loss+Acetyl)GDVEK(XL:C-Thiol(Unsaturated))GK**

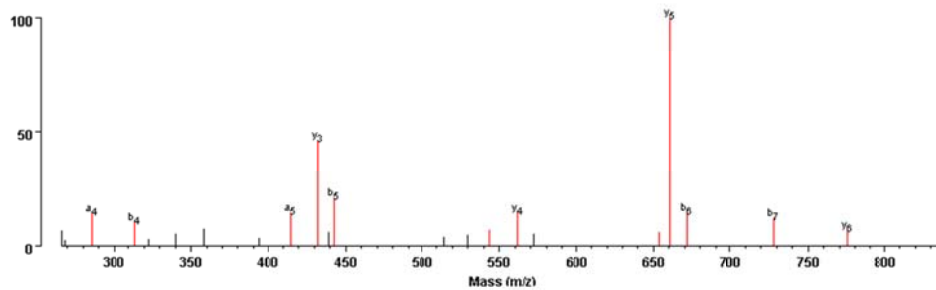

| m/z     | z | Ion Type   |
|---------|---|------------|
| 285.922 | 1 | a,4,+1     |
| 314.057 | 1 | b,4,+1     |
| 415.128 | 1 | a,5,+1     |
|         |   | y-NH3,3,+1 |
| 432.287 | 1 | y,3,+1     |
| 442.903 | 1 | b,5,+1     |
| 543.224 | 1 | y-H2O,4,+1 |
| 561.46  | 1 | y,4,+1     |
| 653.3   | 1 | b-H2O,6,+1 |
| 660.373 | 1 | y,5,+1     |
| 671.182 | 1 | b,6,+1     |
| 728.346 | 1 | b,7,+1     |

|        |   |        |
|--------|---|--------|
| 775.08 | 1 | y,6,+1 |
|--------|---|--------|

**K(XL:C-Alkene)KGEREDLIAYLK<sup>+3</sup>**

**KK(XL:C-Alkene)GEREDLIAYLK<sup>+3</sup>**

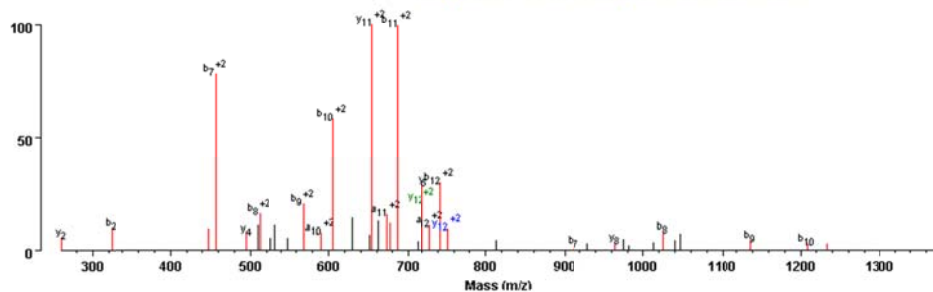

| m/z     | z | Peptide # | Ion Type    |
|---------|---|-----------|-------------|
| 260.533 | 1 | All       | b-NH3,6,+3  |
|         |   | All       | y,2,+1      |
|         |   | All       | b-H2O,6,+3  |
| 325.12  | 1 | All       | b-H2O,5,+2  |
|         |   | All       | b,2,+1      |
|         |   | All       | b-NH3,5,+2  |
| 447.665 | 1 | All       | b-NH3,7,+2  |
|         |   | All       | b-H2O,7,+2  |
| 456.43  | 1 | All       | b,7,+2      |
| 494.379 | 1 | All       | y,4,+1      |
|         |   | All       | b-NH3,4,+1  |
| 512.724 | 1 | All       | b,8,+2      |
| 569.455 | 1 | All       | b,9,+2      |
| 590.712 | 1 | All       | a,10,+2     |
|         |   | All       | y-NH3,5,+1  |
| 604.908 | 1 | All       | b,10,+2     |
| 654.046 | 1 | All       | y,11,+2     |
| 672.168 | 1 | All       | a,11,+2     |
| 677.465 | 1 | All       | b-H2O,11,+2 |
|         |   | All       | b-NH3,11,+2 |
| 686.532 | 1 | All       | b,11,+2     |
| 718.016 | 1 | 1         | y,12,+2     |
| 720.424 | 1 | All       | y,6,+1      |
| 728.991 | 1 | All       | a,12,+2     |
| 743.057 | 1 | All       | b,12,+2     |
|         |   | 2         | y-H2O,12,+2 |
|         |   | 2         | y-NH3,12,+2 |
| 752.049 | 1 | 2         | y,12,+2     |
| 911.558 | 1 | All       | b,7,+1      |

|         |   |     |             |
|---------|---|-----|-------------|
| 964.474 | 1 | All | y,8,+1      |
| 1024.53 | 1 | All | b,8,+1      |
| 1137.58 | 1 | All | b,9,+1      |
| 1208.95 | 1 | All | b,10,+1     |
| 1232.85 | 1 | All | y-NH3,10,+1 |

| Peptide Sequence      | z | d0-dmDSSO |         |   | d10-dmDSSO |         |   |
|-----------------------|---|-----------|---------|---|------------|---------|---|
|                       |   | MS m/z    | MS2 m/z | z | MS m/z     | MS2 m/z | z |
| Ac-GDVEKGGK<br>KKGGER | 4 | 426.9798  | 501.750 | 2 | 429.4966   | 504.266 | 2 |
|                       |   |           | 343.203 | 2 |            | 361.706 | 2 |

**M(Met-loss+Acetyl)GDVEK(XL:D-Thiol(Unsaturated))GKK<sup>+2</sup>**

**M(Met-loss+Acetyl)GDVEKGGK(XL:D-Thiol(Unsaturated))K<sup>+2</sup>**

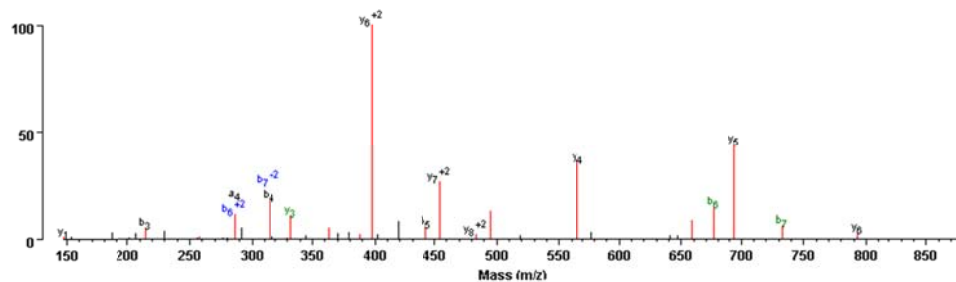

| m/z     | z | Peptide # | Ion Type   |
|---------|---|-----------|------------|
| 146.946 | 1 | All       | y,1,+1     |
| 214.981 | 1 | All       | b,3,+1     |
| 258.358 | 1 | 1         | y-NH3,2,+1 |
| 286.144 | 1 | All       | a,4,+1     |
|         |   | 2         | b,6,+2     |
| 314.202 | 1 | All       | b,4,+1     |
|         |   | 2         | b,7,+2     |
| 329.953 | 1 | 1         | b-NH3,6,+2 |
|         |   | 1         | b-H2O,6,+2 |
| 332.123 | 1 | 1         | y,3,+1     |

|         |   |     |            |
|---------|---|-----|------------|
| 362.84  | 1 | 2   | y-NH3,2,+1 |
| 388.134 | 1 | All | y-H2O,6,+2 |
|         |   | All | y-NH3,6,+2 |
| 397.417 | 1 | All | y,6,+2     |
| 443.168 | 1 | All | b,5,+1     |
| 454.706 | 1 | All | y,7,+2     |
| 483.051 | 1 | All | y,8,+2     |
| 495.406 | 1 | All | MH-H2O,,+2 |
|         |   | All | MH-NH3,,+2 |
| 565.361 | 1 | All | y,4,+1     |
| 658.528 | 1 | 1   | b-H2O,6,+1 |
| 676.246 | 1 | 1   | b,6,+1     |
|         |   | All | y-H2O,5,+1 |
| 694.325 | 1 | All | y,5,+1     |
| 733.039 | 1 | 1   | b,7,+1     |
| 793.27  | 1 | All | y,6,+1     |

**K(XL:D-Thiol(Unsaturated))KGER<sup>+2</sup>**

**KK(XL:D-Thiol(Unsaturated))GER<sup>+2</sup>**

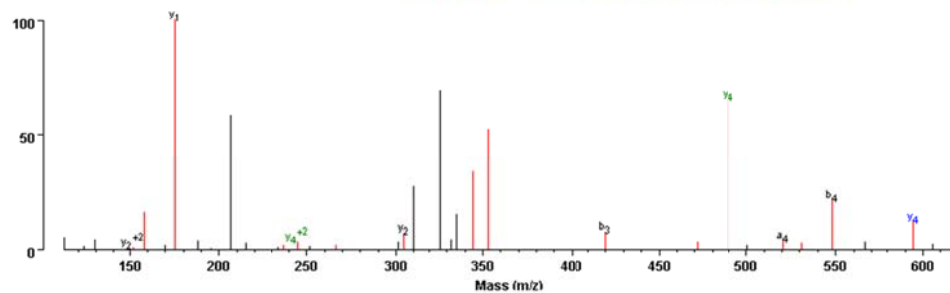

| m/z     | z | Peptide # | Ion Type   |
|---------|---|-----------|------------|
| 152.027 | 1 | All       | y,2,+2     |
| 158.144 | 1 | All       | y-NH3,1,+1 |
| 175.18  | 1 | All       | y,1,+1     |
| 236.813 | 1 | 1         | y-NH3,4,+2 |
| 245.018 | 1 | 1         | y,4,+2     |
| 266.184 | 1 | All       | b-NH3,4,+2 |
|         |   | All       | b-H2O,4,+2 |
| 304.193 | 1 | All       | y,2,+1     |
| 344.51  | 1 | All       | y-NH3,3,+1 |
| 353.03  | 1 | All       | MH-NH3,,+2 |
|         |   | All       | MH-H2O,,+2 |
| 419.435 | 1 | All       | b,3,+1     |
| 471.519 | 1 | 1         | y-H2O,4,+1 |
| 489.289 | 1 | 1         | y,4,+1     |

|         |   |     |            |
|---------|---|-----|------------|
| 520.648 | 1 | All | a,4,+1     |
| 531.237 | 1 | All | b-NH3,4,+1 |
| 548.149 | 1 | All | b,4,+1     |
| 594.262 | 1 | 2   | y,4,+1     |

| Peptide Sequence            | z   | d0-dmDSSO |         |   | d10-dmDSSO |         |   |
|-----------------------------|-----|-----------|---------|---|------------|---------|---|
|                             |     | MS m/z    | MS2 m/z | z | MS m/z     | MS2 m/z | z |
| Ac-GDVEKGKK<br>KKGREDLIAYLK | 5,4 | 530.8882  | 501.751 | 2 | 532.9012   | 504.265 | 2 |
|                             |     |           | 544.311 | 3 |            | 556.644 | 3 |

**M(Met-loss+Acetyl)GDVEK(XL:C-Thiol(Unsaturated))GKK<sup>+2</sup>**

**M(Met-loss+Acetyl)GDVEKGK(XL:C-Thiol(Unsaturated))K<sup>+2</sup>**

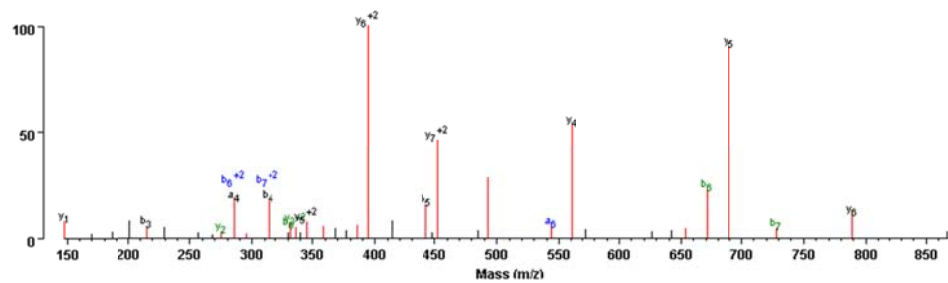

| m/z      | z | Peptide # | Ion Type   |
|----------|---|-----------|------------|
| 147.2590 | 1 | All       | y,1,+1     |
| 215.0590 | 1 | All       | b,3,+1     |
| 275.1090 | 1 | 1         | y,2,+1     |
| 286.0010 | 1 | All       | a,4,+1     |
|          |   | 2         | b,6,+2     |
| 295.5650 | 1 | All       | b-H2O,4,+1 |
| 314.1110 | 1 | All       | b,4,+1     |
|          |   | 2         | b,7,+2     |
| 332.2720 | 1 | 1         | y,3,+1     |
| 336.3140 | 1 | All       | y-H2O,5,+2 |

|          |   |     |            |
|----------|---|-----|------------|
|          |   | 1   | b,6,+2     |
|          |   | All | y-NH3,5,+2 |
| 345.1520 | 1 | All | y,5,+2     |
| 358.0480 | 1 | 2   | y-NH3,2,+1 |
| 385.9520 | 1 | All | y-H2O,6,+2 |
|          |   | All | y-NH3,6,+2 |
| 394.6280 | 1 | All | y,6,+2     |
| 443.1350 | 1 | All | b,5,+1     |
|          |   | All | y-H2O,7,+2 |
|          |   | All | y-NH3,7,+2 |
| 452.2810 | 1 | All | y,7,+2     |
| 493.0260 | 1 | All | MH-NH3,,+2 |
|          |   | All | MH-H2O,,+2 |
| 543.4100 | 1 | All | y-NH3,4,+1 |
|          |   | 2   | a,6,+1     |
| 560.2230 | 1 | All | y,4,+1     |
| 653.3310 | 1 | 1   | b-H2O,6,+1 |
| 671.2200 | 1 | 1   | b,6,+1     |
|          |   | All | y-H2O,5,+1 |
| 689.2500 | 1 | All | y,5,+1     |
| 728.1170 | 1 | 1   | b,7,+1     |
| 788.4530 | 1 | All | y,6,+1     |

**K(XL:C-Alkene)KGEREDLIAYLK<sup>+3</sup>**

**KK(XL:C-Alkene)GEREDLIAYLK<sup>+3</sup>**

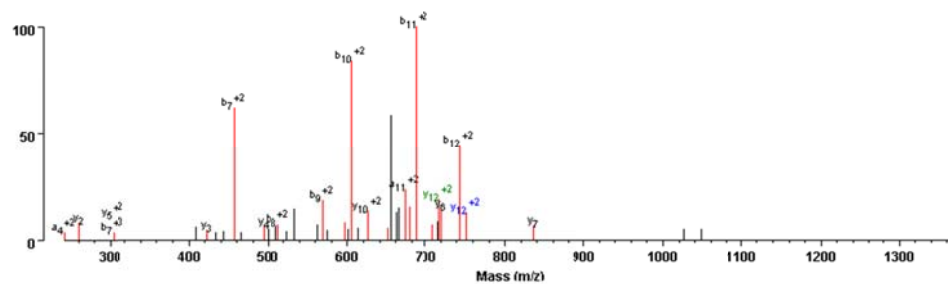

| m/z      | z | Peptide # | Ion Type   |
|----------|---|-----------|------------|
| 242.1460 | 1 | All       | a,4,+2     |
| 260.1600 | 1 | All       | b-H2O,6,+3 |
|          |   | All       | y,2,+1     |
|          |   | All       | b-NH3,6,+3 |
| 304.6860 | 1 | All       | b,7,+3     |
|          |   | All       | y,5,+2     |
| 423.2150 | 1 | All       | y,3,+1     |

|           |   |     |             |
|-----------|---|-----|-------------|
| 456.4350  | 1 | All | b,7,+2      |
| 494.5400  | 1 | All | y,4,+1      |
|           |   | All | b-NH3,4,+1  |
| 513.1400  | 1 | All | b,8,+2      |
| 569.8390  | 1 | All | b,9,+2      |
| 596.1490  | 1 | All | b-NH3,10,+2 |
|           |   | All | b-H2O,10,+2 |
| 604.9100  | 1 | All | b,10,+2     |
| 625.2960  | 1 | All | y,10,+2     |
| 650.8530  | 1 | All | b-NH3,5,+1  |
| 672.6320  | 1 | All | a,11,+2     |
| 677.6150  | 1 | All | b-NH3,11,+2 |
|           |   | All | b-H2O,11,+2 |
| 686.5760  | 1 | All | b,11,+2     |
| 708.9460  | 1 | 1   | y-H2O,12,+2 |
|           |   | 1   | y-NH3,12,+2 |
| 717.9670  | 1 | 1   | y,12,+2     |
| 720.2230  | 1 | All | y,6,+1      |
| 743.0950  | 1 | All | b,12,+2     |
|           |   | 2   | y-H2O,12,+2 |
|           |   | 2   | y-NH3,12,+2 |
| 752.4090  | 1 | 2   | y,12,+2     |
| 835.3970  | 1 | All | y,7,+1      |
| 1376.7800 | 1 | All | b,11,+1     |



| Peptide Sequence | z | d0-dmDSSO |         |   | d10-dmDSSO |         |   |
|------------------|---|-----------|---------|---|------------|---------|---|
|                  |   | MS m/z    | MS2 m/z | z | MS m/z     | MS2 m/z | z |
| KIFVQK           | 3 | 844.7656  | 862.487 | 1 | 848.12     |         |   |
| KTGQAPGFSYTDANK  |   |           | 826.901 | 2 |            |         |   |

**K(XL:C-Thiol(Unsaturated))IFVQK**

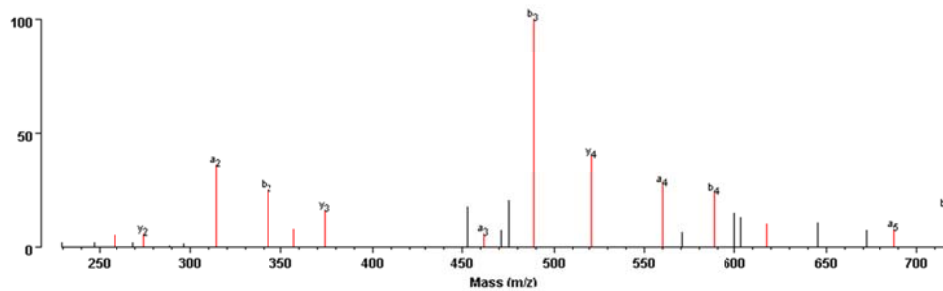

| m/z      | z | Ion Type   |
|----------|---|------------|
| 258.1960 | 1 | y-NH3,2,+1 |
| 274.9450 | 1 | y,2,+1     |
| 314.2480 | 1 | a,2,+1     |
| 342.2310 | 1 | b,2,+1     |
| 357.1850 | 1 | y-NH3,3,+1 |
| 374.2930 | 1 | y,3,+1     |
| 461.7520 | 1 | a,3,+1     |
| 489.1570 | 1 | b,3,+1     |
| 521.1310 | 1 | y,4,+1     |
| 560.2440 | 1 | a,4,+1     |
| 588.0060 | 1 | b,4,+1     |
| 617.4890 | 1 | y-NH3,5,+1 |

|          |   |        |
|----------|---|--------|
| 687.9550 | 1 | a,5,+1 |
| 716.2110 | 1 | b,5,+1 |

**K(XL:C-Alkene)TGQAPGFSYTDANK<sup>+2</sup>**

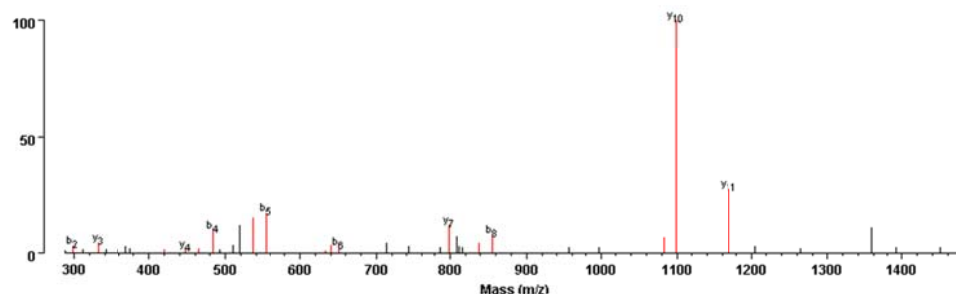

| m/z       | z | Ion Type    |
|-----------|---|-------------|
| 297.7810  | 1 | b,2,+1      |
| 332.1290  | 1 | y,3,+1      |
| 420.2150  | 1 | b-NH3,8,+2  |
| 447.5140  | 1 | y,4,+1      |
| 465.2880  | 1 | b-H2O,4,+1  |
|           |   | y-NH3,8,+2  |
| 483.2390  | 1 | b,4,+1      |
| 536.3560  | 1 | b-H2O,5,+1  |
| 554.1760  | 1 | b,5,+1      |
| 633.1890  | 1 | b-H2O,6,+1  |
| 641.2940  | 1 | y-NH3,12,+2 |
|           |   | y-H2O,12,+2 |
| 651.2650  | 1 | b,6,+1      |
| 798.4140  | 1 | y,7,+1      |
| 838.4890  | 1 | b-NH3,8,+1  |
| 855.6830  | 1 | b,8,+1      |
| 1082.6000 | 1 | y-NH3,10,+1 |
| 1099.3700 | 1 | y,10,+1     |
| 1170.5200 | 1 | y,11,+1     |

| Peptide Sequence | z | d0-dmDSSO |         |   | d10-dmDSSO |         |   |
|------------------|---|-----------|---------|---|------------|---------|---|
|                  |   | MS m/z    | MS2 m/z | z | MS m/z     | MS2 m/z | z |
| KIFVQK           | 4 | 391.978   | 415.761 | 2 | 394.4941   | 418.276 | 2 |
| KKGER            |   |           | 359.190 | 2 |            | 361.705 | 2 |

**K(XL:D-Alkene)IFVQK<sup>+2</sup>**

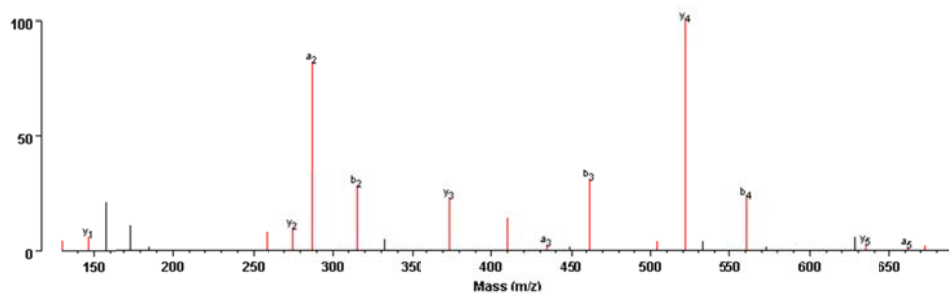

| m/z      | z | Ion Type   |
|----------|---|------------|
| 130.1580 | 1 | y-NH3,1,+1 |
|          |   | y-NH3,2,+2 |
| 146.8980 | 1 | y,1,+1     |
| 258.0660 | 1 | y-NH3,2,+1 |
| 275.0040 | 1 | y,2,+1     |
| 287.2700 | 1 | a,2,+1     |
| 315.2240 | 1 | b,2,+1     |
| 374.3680 | 1 | y,3,+1     |
| 409.8490 | 1 | MH-NH3,,+2 |
| 434.6110 | 1 | a,3,+1     |
| 462.2150 | 1 | b,3,+1     |
| 504.1420 | 1 | y-NH3,4,+1 |

|          |   |            |
|----------|---|------------|
| 521.3270 | 1 | y,4,+1     |
| 560.9200 | 1 | b,4,+1     |
| 634.5070 | 1 | y,5,+1     |
| 661.5020 | 1 | a,5,+1     |
| 672.6900 | 1 | b-NH3,5,+1 |

K(XL:D-Alkene)KGER<sup>+2</sup>

KK(XL:D-Alkene)GER<sup>+2</sup>

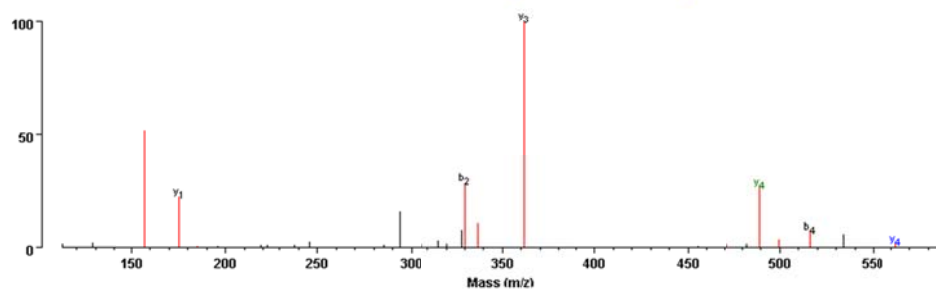

| m/z      | z | Peptide # | Ion Type   |
|----------|---|-----------|------------|
| 157.2090 | 1 | All       | b-NH3,2,+2 |
| 175.1340 | 1 | All       | y,1,+1     |
| 185.1730 | 1 | All       | b-NH3,3,+2 |
| 330.2630 | 1 | All       | b,2,+1     |
| 337.0200 | 1 | All       | MH-NH3,,+2 |
|          |   | All       | MH-H2O,,+2 |
| 361.1900 | 1 | All       | y,3,+1     |
| 471.3990 | 1 | 1         | y-H2O,4,+1 |
| 489.1300 | 1 | 1         | y,4,+1     |
| 499.5470 | 1 | All       | b-NH3,4,+1 |
| 516.1390 | 1 | All       | b,4,+1     |
| 562.4720 | 1 | 2         | y,4,+1     |

| Peptide Sequence    | z | d0-dmDSSO |         |   | d10-dmDSSO |                    |        |
|---------------------|---|-----------|---------|---|------------|--------------------|--------|
|                     |   | MS m/z    | MS2 m/z | z | MS m/z     | MS2 m/z            | z      |
| KIFVQK<br>EDLIAYLKK | 3 | 680.72    |         |   | 684.0757   | 867.513<br>583.346 | 1<br>2 |

**K(XL:D-Thiol(Unsaturated))IFVQK**

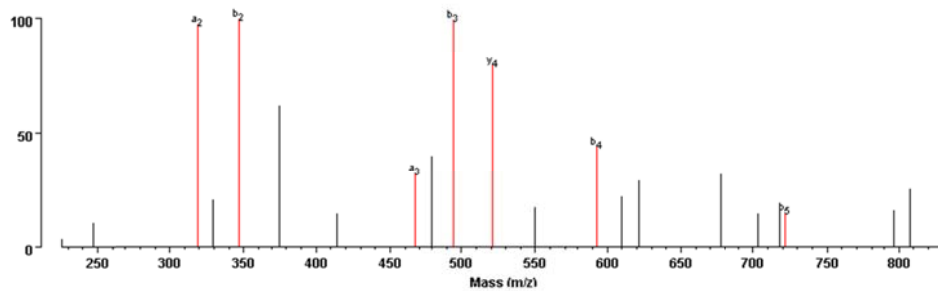

| m/z      | z | Ion Type |
|----------|---|----------|
| 319.0800 | 1 | a,2,+1   |
| 347.0030 | 1 | b,2,+1   |
| 466.5910 | 1 | a,3,+1   |
| 494.3930 | 1 | b,3,+1   |
| 521.4120 | 1 | y,4,+1   |
| 593.1750 | 1 | b,4,+1   |
| 721.4790 | 1 | b,5,+1   |

**EDLIAYLK(XL:D-Alkene)K<sup>+2</sup>**

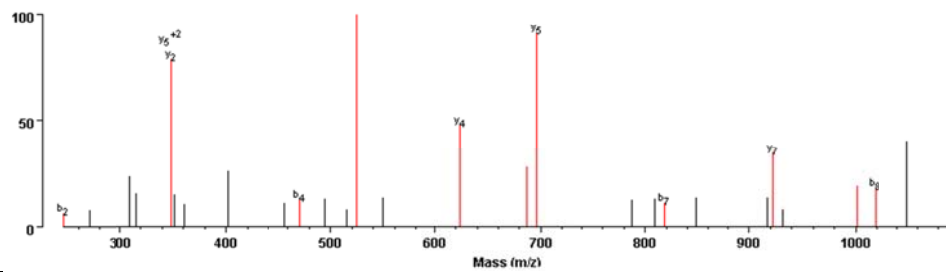

| m/z       | z | Ion Type                             |
|-----------|---|--------------------------------------|
| 245.0980  | 1 | b <sub>2</sub> ,+1                   |
| 348.3530  | 1 | y <sub>2</sub> ,+1                   |
|           |   | y <sub>5</sub> ,+2                   |
| 471.1990  | 1 | b <sub>4</sub> ,+1                   |
| 524.1530  | 1 | b-H <sub>2</sub> O, <sub>5</sub> ,+1 |
| 624.4670  | 1 | y <sub>4</sub> ,+1                   |
| 687.1330  | 1 | b-H <sub>2</sub> O, <sub>6</sub> ,+1 |
| 695.5660  | 1 | y <sub>5</sub> ,+1                   |
| 818.1880  | 1 | b <sub>7</sub> ,+1                   |
| 921.8060  | 1 | y <sub>7</sub> ,+1                   |
| 1001.5000 | 1 | b-H <sub>2</sub> O, <sub>8</sub> ,+1 |
| 1019.1200 | 1 | b <sub>8</sub> ,+1                   |
|           |   | y-H <sub>2</sub> O, <sub>8</sub> ,+1 |
|           |   | y-NH <sub>3</sub> , <sub>8</sub> ,+1 |

| Peptide Sequence | z | d0-dmDSSO |         |   | d10-dmDSSO |         |   |
|------------------|---|-----------|---------|---|------------|---------|---|
|                  |   | MS m/z    | MS2 m/z | z | MS m/z     | MS2 m/z | z |
| KIFVQK           | 4 | 596.3345  | 415.761 | 2 | 598.8497   | 418.277 | 2 |
| GEREDLIAYLKK     |   |           | 767.902 | 2 |            | 770.417 | 2 |

**K(XL:D-Alkene)IFVQK<sup>+2</sup>**

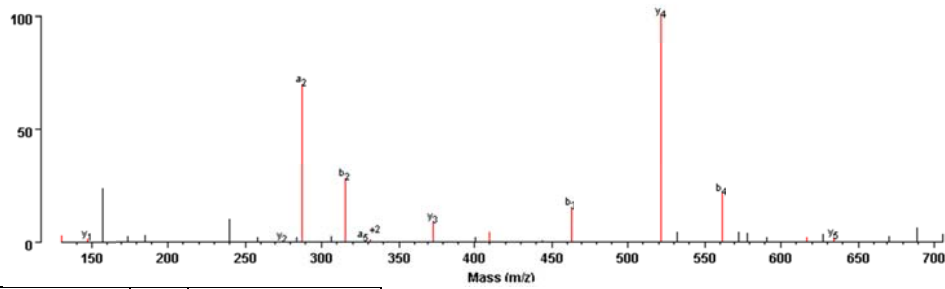

| m/z     | z | Ion Type   |
|---------|---|------------|
| 320.529 | 1 | y-NH3,4,+2 |
| 380.185 | 1 | y,2,+1     |
| 443.316 | 1 | b,8,+2     |
| 472.52  | 1 | b,4,+1     |
| 493.372 | 1 | y,3,+1     |
| 515.531 | 1 | b-NH3,9,+2 |
|         |   | b-H2O,9,+2 |
| 559.556 | 1 | a,5,+1     |
| 587.272 | 1 | b,5,+1     |

|         |   |            |
|---------|---|------------|
| 656.33  | 1 | y,4,+1     |
| 700.36  | 1 | b,6,+1     |
| 727.434 | 1 | y,5,+1     |
| 762.135 | 1 | MH-NH3,,+2 |
| 813.179 | 1 | b,7,+1     |
| 884.506 | 1 | b,8,+1     |
| 953.405 | 1 | y,7,+1     |
| 1047.29 | 1 | b,9,+1     |
| 1050.56 | 1 | y-H2O,8,+1 |
| 1160.47 | 1 | b,10,+1    |
| 1393.61 | 1 | b,11,+1    |

**GEREDLIAYLK(XL:D-Thiol(Unsaturated))K<sup>+2</sup>**

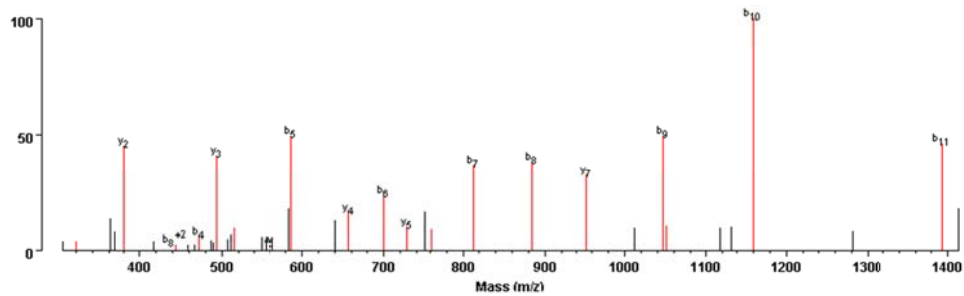

| m/z     | z | Ion Type   |
|---------|---|------------|
| 320.529 | 1 | y-NH3,4,+2 |
| 380.185 | 1 | y,2,+1     |
| 443.316 | 1 | b,8,+2     |
| 472.52  | 1 | b,4,+1     |
| 493.372 | 1 | y,3,+1     |
| 515.531 | 1 | b-NH3,9,+2 |
|         |   | b-H2O,9,+2 |
| 559.556 | 1 | a,5,+1     |
| 587.272 | 1 | b,5,+1     |
| 656.33  | 1 | y,4,+1     |
| 700.36  | 1 | b,6,+1     |
| 727.434 | 1 | y,5,+1     |
| 762.135 | 1 | MH-NH3,,+2 |
| 813.179 | 1 | b,7,+1     |
| 884.506 | 1 | b,8,+1     |
| 953.405 | 1 | y,7,+1     |
| 1047.29 | 1 | b,9,+1     |
| 1050.56 | 1 | y-H2O,8,+1 |
| 1160.47 | 1 | b,10,+1    |
| 1393.61 | 1 | b,11,+1    |



| Peptide Sequence | z | d0-dmDSSO |         |   | d10-dmDSSO |         |   |
|------------------|---|-----------|---------|---|------------|---------|---|
|                  |   | MS m/z    | MS2 m/z | z | MS m/z     | MS2 m/z | z |
| GGKHK            | 3 | 766.0388  | 626.309 | 1 | 769.3952   | 631.341 | 1 |
| KTGQAPGFSYTDANK  |   |           | 826.900 | 2 |            | 829.416 | 2 |

**GGK(XL:C-Thiol(Unsaturated))HK**

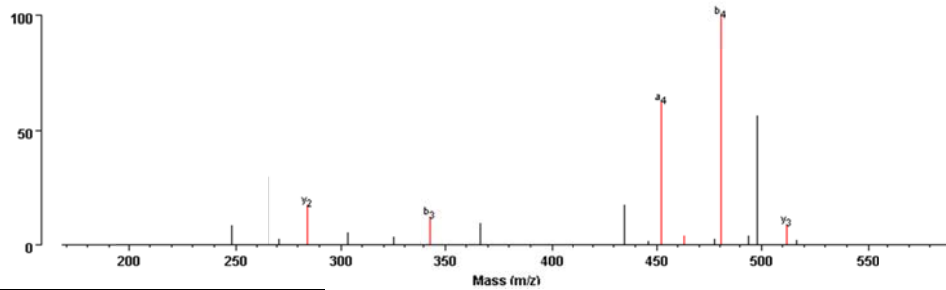

| m/z     | z | Ion Type   |
|---------|---|------------|
| 284.375 | 1 | y,2,+1     |
| 343.093 | 1 | b,3,+1     |
| 452.355 | 1 | a,4,+1     |
| 463.112 | 1 | b-NH3,4,+1 |
| 480.112 | 1 | b,4,+1     |
| 511.901 | 1 | y,3,+1     |

**K(XL:C-Alkene)TGQAPGFSYTDANK<sup>+2</sup>**

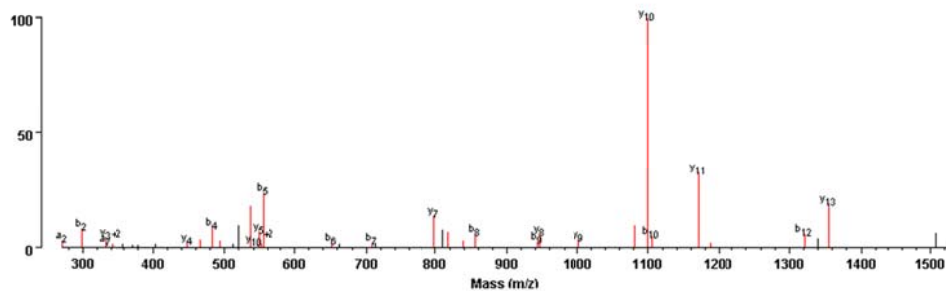

| m/z | z | Ion Type |
|-----|---|----------|
|-----|---|----------|

|         |   |                          |
|---------|---|--------------------------|
| 270.416 | 1 | a,2,+1                   |
| 298.216 | 1 | b,2,+1                   |
| 332.351 | 1 | y,3,+1                   |
| 340.635 | 1 | a,7,+2                   |
| 447.253 | 1 | y,4,+1                   |
| 465.373 | 1 | b-H <sub>2</sub> O,4,+1  |
| 483.166 | 1 | b,4,+1                   |
| 492.849 | 1 | y-H <sub>2</sub> O,9,+2  |
|         |   | y-NH <sub>3</sub> ,9,+2  |
| 536.268 | 1 | b-H <sub>2</sub> O,5,+1  |
| 548.377 | 1 | y,5,+1                   |
| 550.634 | 1 | y,10,+2                  |
| 554.401 | 1 | b,5,+1                   |
| 651.188 | 1 | b,6,+1                   |
| 708.25  | 1 | b,7,+1                   |
| 798.315 | 1 | y,7,+1                   |
| 818.18  | 1 | MH-NH <sub>3</sub> ,,+2  |
|         |   | MH-H <sub>2</sub> O,,+2  |
| 838.446 | 1 | b-NH <sub>3</sub> ,8,+1  |
| 855.248 | 1 | b,8,+1                   |
| 942.414 | 1 | b,9,+1                   |
| 945.59  | 1 | y,8,+1                   |
| 1002.4  | 1 | y,9,+1                   |
| 1081.22 | 1 | y-H <sub>2</sub> O,10,+1 |
| 1099.3  | 1 | y,10,+1                  |
| 1105.34 | 1 | b,10,+1                  |
| 1170.39 | 1 | y,11,+1                  |
| 1188.29 | 1 | b-H <sub>2</sub> O,11,+1 |
| 1321.04 | 1 | b,12,+1                  |
| 1355.27 | 1 | y,13,+1                  |

| Peptide Sequence   | z | d0-dmDSSO |          | d10-dmDSSO |        |         |   |
|--------------------|---|-----------|----------|------------|--------|---------|---|
|                    |   | MS m/z    | MS2 m/z  | z          | MS m/z | MS2 m/z | z |
| GGKHK              | 3 | 950.4685  | 626.308  | 1          | 953.82 |         |   |
| GITWGEETLMEYLENPKK |   |           | 1119.520 | 2          |        |         |   |

**GGK(XL:C-Thiol(Unsaturated))HK**

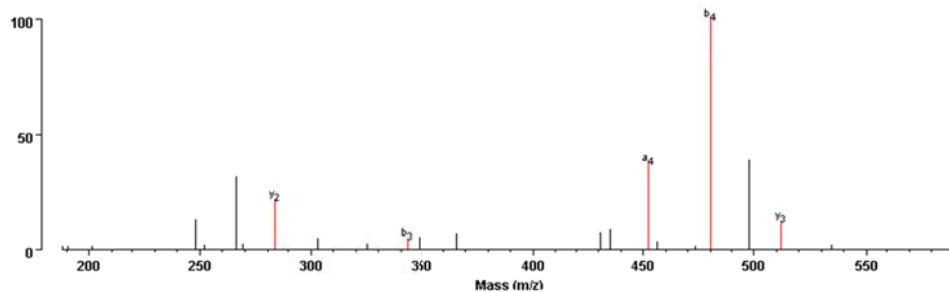

| m/z     | z | Ion Type |
|---------|---|----------|
| 284.027 | 1 | y,2,+1   |
| 343.032 | 1 | b,3,+1   |
| 452.178 | 1 | a,4,+1   |
| 480.164 | 1 | b,4,+1   |
| 512.3   | 1 | y,3,+1   |

**GITWGEETLMEYLENPK(XL:C-Thiol(Unsaturated))K<sup>+2</sup>**

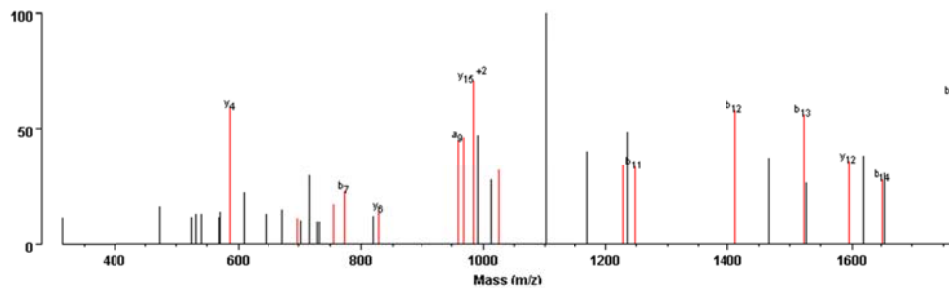

| m/z     | z | Ion Type |
|---------|---|----------|
| 586.297 | 1 | y,4,+1   |

|         |   |                          |
|---------|---|--------------------------|
| 697.65  | 1 | y-H <sub>2</sub> O,5,+1  |
| 754.805 | 1 | b-H <sub>2</sub> O,7,+1  |
| 773.175 | 1 | b,7,+1                   |
| 828.316 | 1 | y,6,+1                   |
| 959.483 | 1 | a,9,+1                   |
| 969.066 | 1 | b-H <sub>2</sub> O,9,+1  |
| 984.334 | 1 | y,15,+2                  |
| 1025.88 | 1 | y-NH <sub>3</sub> ,16,+2 |
|         |   | y-H <sub>2</sub> O,16,+2 |
| 1229.01 | 1 | b-H <sub>2</sub> O,11,+1 |
| 1247.7  | 1 | b,11,+1                  |
| 1410.99 | 1 | b,12,+1                  |
| 1523.32 | 1 | b,13,+1                  |
| 1594.37 | 1 | y,12,+1                  |
| 1652.43 | 1 | b,14,+1                  |
| 1767.07 | 1 | b,15,+1                  |

| Peptide Sequence  | z | d0-dmDSSO |         |   | d10-dmDSSO |         |   |
|-------------------|---|-----------|---------|---|------------|---------|---|
|                   |   | MS m/z    | MS2 m/z | z | MS m/z     | MS2 m/z | z |
| KTGQAPGFSYTDANK   | 4 | 899.9332  | 826.900 | 2 | 902.45     |         |   |
| KTGQAPGFSYTDANKNK |   |           | 963.955 | 2 |            |         |   |

**K(XL:C-Alkene)TGQAPGFSYTDANK<sup>+2</sup>**

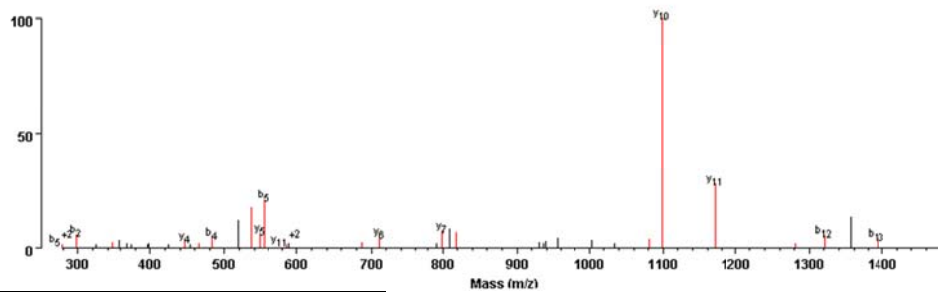

| m/z     | z | Ion Type                              |
|---------|---|---------------------------------------|
| 278.243 | 1 | b <sub>5</sub> ,+2                    |
| 298.276 | 1 | b <sub>2</sub> ,+1                    |
| 347.133 | 1 | y-H <sub>2</sub> O, <sub>6</sub> ,+2  |
|         |   | y-NH <sub>3</sub> , <sub>6</sub> ,+2  |
| 447.218 | 1 | y <sub>4</sub> ,+1                    |
| 465.167 | 1 | b-H <sub>2</sub> O, <sub>4</sub> ,+1  |
|         |   | y-NH <sub>3</sub> , <sub>8</sub> ,+2  |
| 483.324 | 1 | b <sub>4</sub> ,+1                    |
| 536.296 | 1 | b-H <sub>2</sub> O, <sub>5</sub> ,+1  |
| 548.279 | 1 | y <sub>5</sub> ,+1                    |
| 554.072 | 1 | b <sub>5</sub> ,+1                    |
| 585.671 | 1 | y <sub>11</sub> ,+2                   |
| 687.447 | 1 | b-H <sub>2</sub> O, <sub>13</sub> ,+2 |
| 711.469 | 1 | y <sub>6</sub> ,+1                    |
| 798.661 | 1 | y <sub>7</sub> ,+1                    |
| 817.673 | 1 | MH-H <sub>2</sub> O <sub>1</sub> ,+2  |

|         |   |             |
|---------|---|-------------|
| 1081.4  | 1 | y-H2O,10,+1 |
| 1099.32 | 1 | y,10,+1     |
| 1170.44 | 1 | y,11,+1     |
| 1280.67 | 1 | y-H2O,12,+1 |
| 1321.13 | 1 | b,12,+1     |
| 1392.72 | 1 | b,13,+1     |
| 1488.99 | 1 | b-H2O,14,+1 |

**KTGQAPGFSYTDANK(XL:C-Thiol(Unsaturated))NK<sup>+2</sup>**

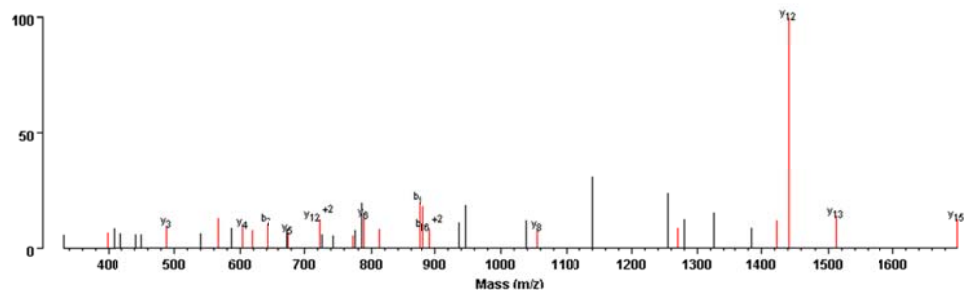

| m/z     | z | Ion Type    |
|---------|---|-------------|
| 398.319 | 1 | b-NH3,4,+1  |
| 489.176 | 1 | y,3,+1      |
| 566.715 | 1 | b-NH3,6,+1  |
| 603.415 | 1 | y,4,+1      |
| 618.093 | 1 | b-H2O,12,+2 |
| 640.681 | 1 | b,7,+1      |
| 674.505 | 1 | y,5,+1      |
| 721.883 | 1 | y,12,+2     |
| 772.583 | 1 | y-NH3,6,+1  |
| 789.244 | 1 | y,6,+1      |
| 812.239 | 1 | y-NH3,14,+2 |
|         |   | y-H2O,14,+2 |
| 874.377 | 1 | b,9,+1      |
| 882.069 | 1 | b-H2O,16,+2 |
|         |   | b-NH3,16,+2 |
| 891.392 | 1 | y-NH3,16,+2 |
|         |   | y-H2O,16,+2 |
|         |   | b,16,+2     |
| 1053.83 | 1 | y,8,+1      |
| 1269.6  | 1 | y-H2O,10,+1 |
| 1423.38 | 1 | y-H2O,12,+1 |
| 1441.77 | 1 | y,12,+1     |
| 1512.91 | 1 | y,13,+1     |
| 1697.28 | 1 | y,15,+1     |

| Peptide Sequence                        | z | d0-dmDSSO |          |   | d10-dmDSSO |         |   |
|-----------------------------------------|---|-----------|----------|---|------------|---------|---|
|                                         |   | MS m/z    | MS2 m/z  | z | MS m/z     | MS2 m/z | z |
| KTGQAPGFSYTDANK<br>NKGITWGEETLMEYLENPKK | 4 | 1038.255  | 826.901  | 2 | 1040.76    |         |   |
|                                         |   |           | 1240.599 | 2 |            |         |   |

**K(XL:C-Alkene)TGQAPGFSYTDANK<sup>+2</sup>**

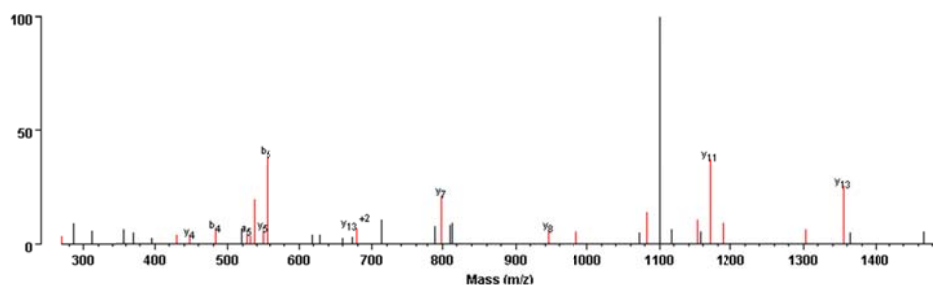

| m/z     | z | Ion Type    |
|---------|---|-------------|
| 269.411 | 1 | b-NH3,5,+2  |
| 430.136 | 1 | y-NH3,4,+1  |
| 447.345 | 1 | y,4,+1      |
| 483.145 | 1 | b,4,+1      |
| 526.781 | 1 | a,5,+1      |
| 531.392 | 1 | y-NH3,5,+1  |
| 536.214 | 1 | b-H2O,5,+1  |
| 548.248 | 1 | y,5,+1      |
| 554.19  | 1 | b,5,+1      |
| 678.843 | 1 | y,13,+2     |
| 798.384 | 1 | y,7,+1      |
| 945.49  | 1 | y,8,+1      |
| 985.629 | 1 | y-NH3,9,+1  |
| 1082.69 | 1 | y-NH3,10,+1 |
| 1152.94 | 1 | y-H2O,11,+1 |
|         |   | y-NH3,11,+1 |
| 1170.37 | 1 | y,11,+1     |
| 1188.57 | 1 | b-H2O,11,+1 |
| 1303.32 | 1 | b-H2O,12,+1 |
| 1355.49 | 1 | y,13,+1     |
| 1489.04 | 1 | b-H2O,14,+1 |

**NK(XL:C-Thiol(Unsaturated))GITWGEETLMEYLENPKK<sup>+2</sup>**

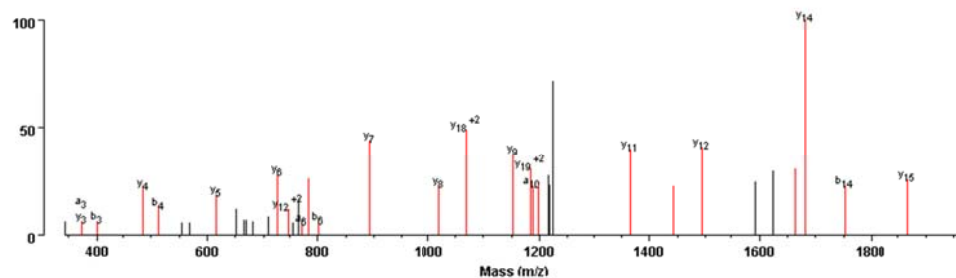

| m/z     | z | Ion Type    |
|---------|---|-------------|
| 372.587 | 1 | y,3,+1      |
|         |   | a,3,+1      |
| 399.665 | 1 | b,3,+1      |
| 486.144 | 1 | y,4,+1      |
| 513.225 | 1 | b,4,+1      |
| 615.384 | 1 | y,5,+1      |
| 728.264 | 1 | y,6,+1      |
| 747.326 | 1 | y,12,+2     |
| 772.448 | 1 | a,6,+1      |
| 783.424 | 1 | b-NH3,6,+1  |
| 800.194 | 1 | b,6,+1      |
| 891.369 | 1 | y,7,+1      |
| 1020.66 | 1 | y,8,+1      |
| 1069.93 | 1 | y,18,+2     |
| 1151.45 | 1 | y,9,+1      |
| 1183.49 | 1 | y,19,+2     |
| 1188.81 | 1 | a,10,+1     |
| 1198    | 1 | b-H2O,10,+1 |
| 1365.54 | 1 | y,11,+1     |
| 1443.22 | 1 | b-NH3,12,+1 |
|         |   | b-H2O,12,+1 |
| 1494.9  | 1 | y,12,+1     |
| 1662.83 | 1 | y-H2O,14,+1 |
| 1680.63 | 1 | y,14,+1     |
| 1753.23 | 1 | b,14,+1     |
| 1866.79 | 1 | y,15,+1     |



| Peptide Sequence                    | z | d0-dmDSSO |         |   | d10-dmDSSO |         |   |
|-------------------------------------|---|-----------|---------|---|------------|---------|---|
|                                     |   | MS m/z    | MS2 m/z | z | MS m/z     | MS2 m/z | z |
| K <b>TL</b> QAPGFSYTDANK<br>KYIPGTK | 3 | 859.4291  | 826.900 | 2 | 862.78     |         |   |
|                                     |   |           | 906.477 | 1 |            |         |   |

**K(XL:C-Alkene)TGQAPGFSYTDANK<sup>+2</sup>**

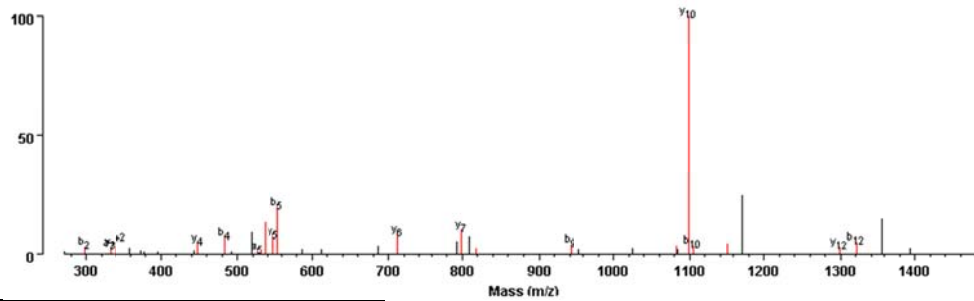

| m/z     | z | Ion Type                 |
|---------|---|--------------------------|
| 298.338 | 1 | b,2,+1                   |
| 332.252 | 1 | y,3,+1                   |
| 340.191 | 1 | a,7,+2                   |
| 447.193 | 1 | y,4,+1                   |
| 483.114 | 1 | b,4,+1                   |
| 526.139 | 1 | a,5,+1                   |
| 530.727 | 1 | y-H <sub>2</sub> O,5,+1  |
|         |   | y-NH <sub>3</sub> ,5,+1  |
| 536.388 | 1 | b-H <sub>2</sub> O,5,+1  |
| 548.286 | 1 | y,5,+1                   |
| 554.355 | 1 | b,5,+1                   |
| 711.43  | 1 | y,6,+1                   |
| 798.217 | 1 | y,7,+1                   |
| 817.864 | 1 | MH-H <sub>2</sub> O,,+2  |
|         |   | MH-NH <sub>3</sub> ,,+2  |
| 942.458 | 1 | b,9,+1                   |
| 1082.38 | 1 | y-NH <sub>3</sub> ,10,+1 |
| 1099.4  | 1 | y,10,+1                  |
| 1105.06 | 1 | b,10,+1                  |
| 1152.58 | 1 | y-H <sub>2</sub> O,11,+1 |
| 1299.13 | 1 | y,12,+1                  |
| 1321.25 | 1 | b,12,+1                  |

### K(XL:C-Thiol(Unsaturated))YIPGTK

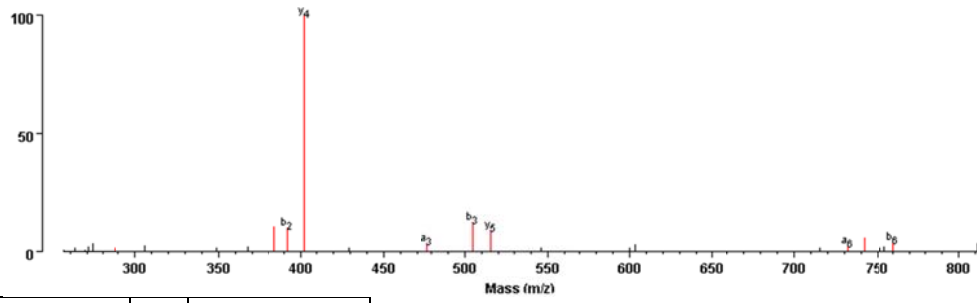

| m/z     | z | Ion Type   |
|---------|---|------------|
| 287.202 | 1 | y-H2O,3,+1 |
| 384.052 | 1 | y-H2O,4,+1 |
| 391.996 | 1 | b,2,+1     |
| 402.323 | 1 | y,4,+1     |
| 477.141 | 1 | a,3,+1     |
| 505.135 | 1 | b,3,+1     |
| 515.413 | 1 | y,5,+1     |
| 732.245 | 1 | a,6,+1     |
| 742.302 | 1 | b-H2O,6,+1 |
| 760.123 | 1 | b,6,+1     |

| Peptide Sequence            | z | d0-dmDSSO |         |   | d10-dmDSSO |          |   |
|-----------------------------|---|-----------|---------|---|------------|----------|---|
|                             |   | MS m/z    | MS2 m/z | z | MS m/z     | MS2 m/z  | z |
| KTGQAPGFSYTDANK<br>MIFAGIKK | 3 | 893.12    |         |   | 896.4719   | 829.416  | 2 |
|                             |   |           |         |   |            | 1012.573 | 1 |

**K(XL:D-Alkene)TGQAPGFSYTDANK<sup>+2</sup>**

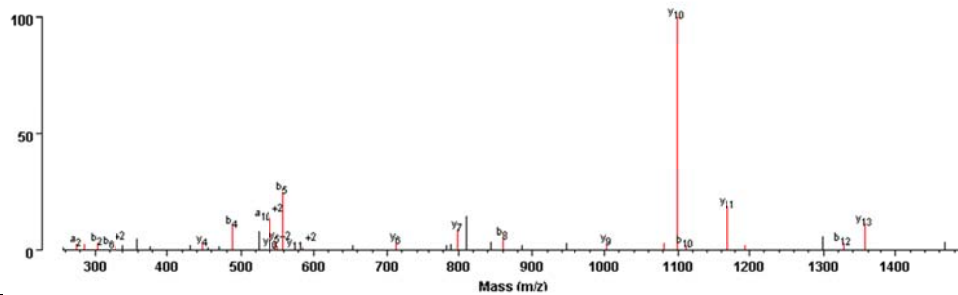

| m/z     | z | Ion Type    |
|---------|---|-------------|
| 275.471 | 1 | a,2,+1      |
| 285.272 | 1 | b-H2O,2,+1  |
| 303.632 | 1 | b,2,+1      |
| 329.172 | 1 | b,6,+2      |
| 447.442 | 1 | y,4,+1      |
| 488.282 | 1 | b,4,+1      |
| 541.204 | 1 | y-H2O,10,+2 |
|         |   | b-H2O,5,+1  |
|         |   | y-NH3,10,+2 |
|         |   | a,10,+2     |
| 548.337 | 1 | y,5,+1      |
| 550.589 | 1 | y,10,+2     |
| 559.324 | 1 | b,5,+1      |
| 585.875 | 1 | y,11,+2     |
| 711.37  | 1 | y,6,+1      |
| 798.418 | 1 | y,7,+1      |
| 860.179 | 1 | b,8,+1      |
| 1002.64 | 1 | y,9,+1      |
| 1081.89 | 1 | y-H2O,10,+1 |
|         |   | y-NH3,10,+1 |
| 1099.5  | 1 | y,10,+1     |
| 1110.52 | 1 | b,10,+1     |
| 1170.43 | 1 | y,11,+1     |
| 1194.46 | 1 | b-NH3,11,+1 |
| 1326.87 | 1 | b,12,+1     |
| 1355.37 | 1 | y,13,+1     |
| 1493.41 | 1 | b-H2O,14,+1 |

### MIFAGIK(XL:D-Thiol(Unsaturated))K

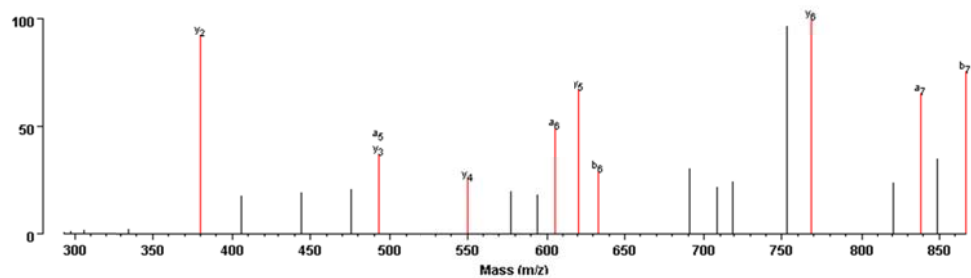

| m/z     | z | Ion Type |
|---------|---|----------|
| 380.246 | 1 | y,2,+1   |
| 492.863 | 1 | y,3,+1   |
|         |   | a,5,+1   |
| 550.307 | 1 | y,4,+1   |
| 605.153 | 1 | a,6,+1   |
| 621.202 | 1 | y,5,+1   |
| 633.186 | 1 | b,6,+1   |
| 768.432 | 1 | y,6,+1   |
| 838.412 | 1 | a,7,+1   |
| 866.385 | 1 | b,7,+1   |

| Peptide Sequence                             | z | d0-dmDSSO |          |   | d10-dmDSSO |          |   |
|----------------------------------------------|---|-----------|----------|---|------------|----------|---|
|                                              |   | MS m/z    | MS2 m/z  | z | MS m/z     | MS2 m/z  | z |
| K <b>TGQAPGFSYTDANK</b><br>EDLIAYLK <b>K</b> | 3 | 954.8138  | 826.898  | 2 | 958.1652   | 829.414  | 2 |
|                                              |   |           | 1192.630 | 1 |            | 1197.663 | 1 |

**K(XL:D-Alkene)TGQAPGFSYTDANK<sup>+2</sup>**

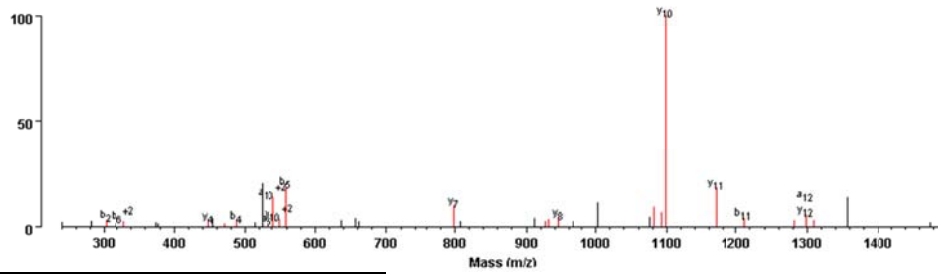

| m/z     | z | Ion Type    |
|---------|---|-------------|
| 303.217 | 1 | b,2,+1      |
| 328.412 | 1 | b,6,+2      |
| 447.395 | 1 | y,4,+1      |
| 470.227 | 1 | b-H2O,4,+1  |
| 488.188 | 1 | b,4,+1      |
| 531.601 | 1 | a,5,+1      |
|         |   | y-NH3,5,+1  |
| 541.375 | 1 | b-H2O,5,+1  |
|         |   | y-H2O,10,+2 |
|         |   | y-NH3,10,+2 |
|         |   | a,10,+2     |
| 549.975 | 1 | y,10,+2     |
| 559.022 | 1 | b,5,+1      |
| 798.555 | 1 | y,7,+1      |
| 927.316 | 1 | y-H2O,8,+1  |
| 930.749 | 1 | b-NH3,9,+1  |
| 945.376 | 1 | y,8,+1      |
| 1081.62 | 1 | y-H2O,10,+1 |
| 1092.53 | 1 | b-H2O,10,+1 |
| 1099.35 | 1 | y,10,+1     |
| 1170.53 | 1 | y,11,+1     |
| 1212.04 | 1 | b,11,+1     |
| 1281.67 | 1 | y-          |
| 1298.39 | 1 | y,12,+1     |
|         |   | a,12,+1     |
| 1308.58 | 1 | b-H2O,12,+1 |

**EDLIAYLK(XL:D-Thiol(Unsaturated))K**

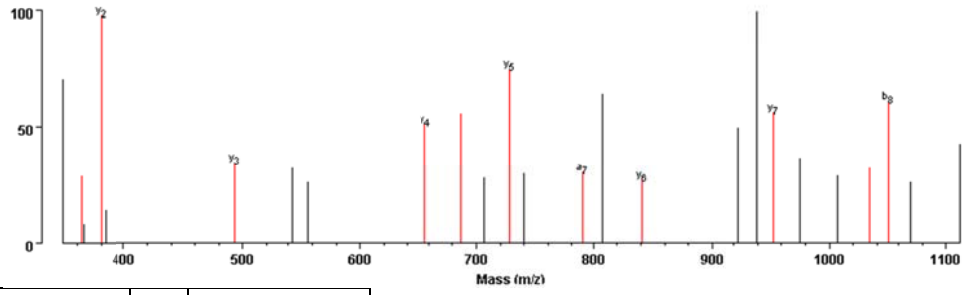

| m/z     | z | Ion Type                |
|---------|---|-------------------------|
| 363.128 | 1 | y-NH <sub>3</sub> ,2,+1 |
| 380.249 | 1 | y,2,+1                  |
| 493.359 | 1 | y,3,+1                  |
| 656.59  | 1 | y,4,+1                  |
| 687.042 | 1 | b-H <sub>2</sub> O,6,+1 |
| 727.468 | 1 | y,5,+1                  |
| 790.959 | 1 | a,7,+1                  |
| 840.518 | 1 | y,6,+1                  |
| 953.572 | 1 | y,7,+1                  |
| 1033.45 | 1 | b-H <sub>2</sub> O,8,+1 |
| 1051.58 | 1 | y-NH <sub>3</sub> ,8,+1 |
|         |   | b,8,+1                  |

| Peptide Sequence | z | d0-dmDSSO |         |   | d10-dmDSSO |         |   |
|------------------|---|-----------|---------|---|------------|---------|---|
|                  |   | MS m/z    | MS2 m/z | z | MS m/z     | MS2 m/z | z |
| KTGQAPGFSYTDANK  | 4 | 801.65    |         |   | 804.4185   | 829.418 | 2 |
| GEREDLIAYLKK     |   |           |         |   |            | 770.418 | 2 |

**K(XL:D-Alkene)TGQAPGFSYTDANK<sup>+2</sup>**

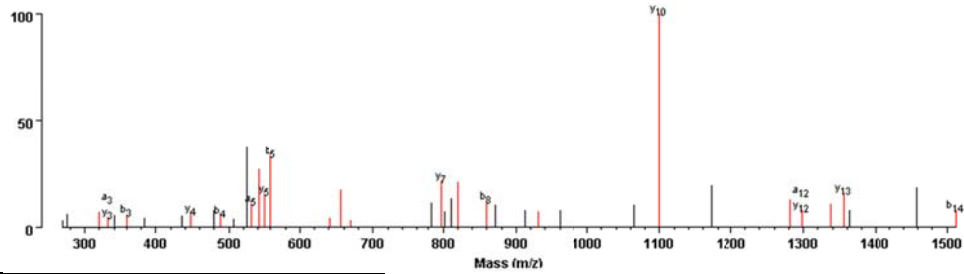

| m/z     | z | Ion Type    |
|---------|---|-------------|
| 319.249 | 1 | b-H2O,6,+2  |
| 332.112 | 1 | y,3,+1      |
|         |   | a,3,+1      |
| 360.517 | 1 | b,3,+1      |
| 447.206 | 1 | y,4,+1      |
| 488.189 | 1 | b,4,+1      |
| 531.235 | 1 | y-NH3,5,+1  |
|         |   | a,5,+1      |
| 541.15  | 1 | y-H2O,10,+2 |
|         |   | b-H2O,5,+1  |
|         |   | y-NH3,10,+2 |
| 548.075 | 1 | y,5,+1      |
| 559.482 | 1 | b,5,+1      |
| 640.819 | 1 | y-H2O,12,+2 |
|         |   | y-NH3,12,+2 |
| 655.748 | 1 | b-NH3,12,+2 |
| 669.429 | 1 | y-H2O,13,+2 |
|         |   | y-NH3,13,+2 |
| 798.146 | 1 | y,7,+1      |
| 820.915 | 1 | MH-NH3,,+2  |
|         |   | MH-H2O,,+2  |
| 859.933 | 1 | b,8,+1      |
| 930.227 | 1 | b-NH3,9,+1  |
| 1099.42 | 1 | y,10,+1     |
| 1281.65 | 1 | y-NH3,12,+1 |
| 1298.53 | 1 | y,12,+1     |
|         |   | a,12,+1     |

|         |   |                          |
|---------|---|--------------------------|
| 1338.01 | 1 | y-H <sub>2</sub> O,13,+1 |
|         |   | y-NH <sub>3</sub> ,13,+1 |
| 1355.23 | 1 | y,13,+1                  |
| 1511.71 | 1 | b,14,+1                  |

**GEREDLIAYLK(XL:D-Thiol(Unsaturated))K<sup>+2</sup>**

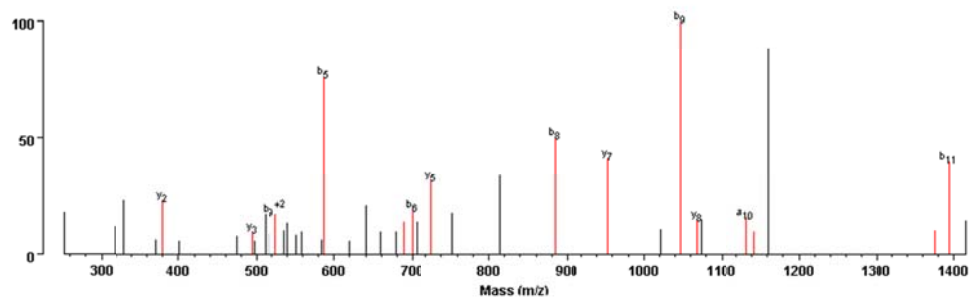

| m/z     | z | Ion Type                 |
|---------|---|--------------------------|
| 380.284 | 1 | y,2,+1                   |
| 493.333 | 1 | y,3,+1                   |
| 524.644 | 1 | b,9,+2                   |
| 587.252 | 1 | b,5,+1                   |
| 688.344 | 1 | b-H <sub>2</sub> O,11,+2 |
|         |   | b-NH <sub>3</sub> ,11,+2 |
| 700.555 | 1 | b,6,+1                   |
| 727.021 | 1 | y,5,+1                   |
| 884.54  | 1 | b,8,+1                   |
| 953.352 | 1 | y,7,+1                   |
| 1047.31 | 1 | b,9,+1                   |
| 1068.47 | 1 | y,8,+1                   |
| 1132.31 | 1 | a,10,+1                  |
| 1142.72 | 1 | b-H <sub>2</sub> O,10,+1 |
| 1375.7  | 1 | b-H <sub>2</sub> O,11,+1 |
| 1393.34 | 1 | b,11,+1                  |





|         |   |         |
|---------|---|---------|
| 1738.95 | 1 | y,14,+1 |
| 1839.58 | 1 | y,15,+1 |
| 1962.37 | 1 | b,16,+1 |

**K(XL:C-Thiol(Unsaturated))YIPGTK**

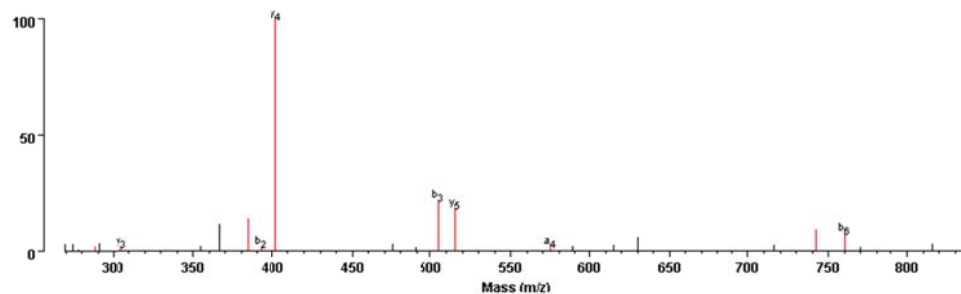

| m/z     | z | Ion Type   |
|---------|---|------------|
| 288.354 | 1 | y-NH3,3,+1 |
| 305.166 | 1 | y,3,+1     |
| 384.296 | 1 | y-H2O,4,+1 |
| 392.182 | 1 | b,2,+1     |
| 402.279 | 1 | y,4,+1     |
| 505.331 | 1 | b,3,+1     |
| 515.149 | 1 | y,5,+1     |
| 574.852 | 1 | a,4,+1     |
| 742.314 | 1 | b-H2O,6,+1 |
| 759.919 | 1 | b,6,+1     |

| Peptide Sequence               | z | d0-dmDSSO |         |   | d10-dmDSSO |          |   |
|--------------------------------|---|-----------|---------|---|------------|----------|---|
|                                |   | MS m/z    | MS2 m/z | z | MS m/z     | MS2 m/z  | z |
| GITWGEETLMEYLENPKK<br>MIFAGIKK | 3 | 1077.54   |         |   | 1080.8999  | 1122.044 | 2 |
|                                |   |           |         |   |            | 980.604  | 1 |

**GITWGEETLMEYLENPK(XL:D-Thiol(Unsaturated))K<sup>+2</sup>**

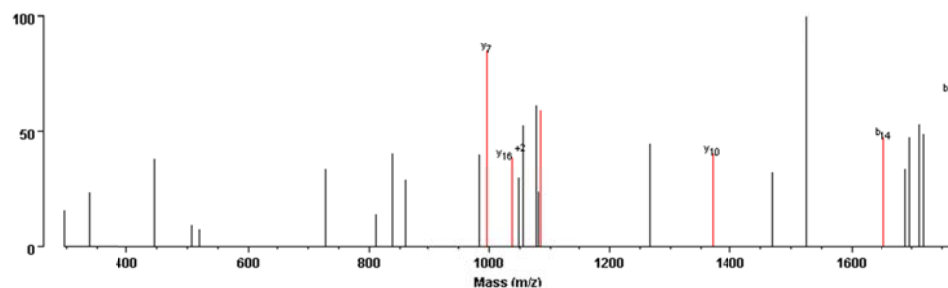

| m/z     | z | Ion Type    |
|---------|---|-------------|
| 996.347 | 1 | y,7,+1      |
| 1037.38 | 1 | y,16,+2     |
| 1084.5  | 1 | y-H2O,17,+2 |
|         |   | y-NH3,17,+2 |
| 1370.22 | 1 | y,10,+1     |
| 1653.26 | 1 | b,14,+1     |
| 1766.69 | 1 | b,15,+1     |

**MIFAGIK(XL:D-Alkene)K**

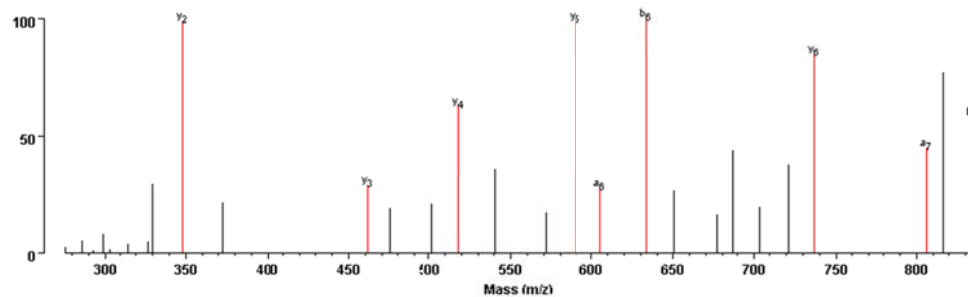

| m/z     | z | Ion Type |
|---------|---|----------|
| 348.376 | 1 | y,2,+1   |
| 461.358 | 1 | y,3,+1   |
| 518.38  | 1 | y,4,+1   |
| 589.355 | 1 | y,5,+1   |
| 605.201 | 1 | a,6,+1   |
| 633.355 | 1 | b,6,+1   |
| 736.568 | 1 | y,6,+1   |
| 806.417 | 1 | a,7,+1   |
| 834.264 | 1 | b,7,+1   |

| Peptide Sequence                   | z | d0-dmDSSO |                     |        | d10-dmDSSO |         |   |
|------------------------------------|---|-----------|---------------------|--------|------------|---------|---|
|                                    |   | MS m/z    | MS2 m/z             | z      | MS m/z     | MS2 m/z | z |
| GITWGEETLMEYLENPKK<br>M(ox)IFAGIKK | 3 | 1081.8778 | 1119.523<br>991.571 | 2<br>1 | 1085.23    |         |   |

**GITWGEETLMEYLENPK(XL:C-Thiol(Unsaturated))K<sup>+2</sup>**

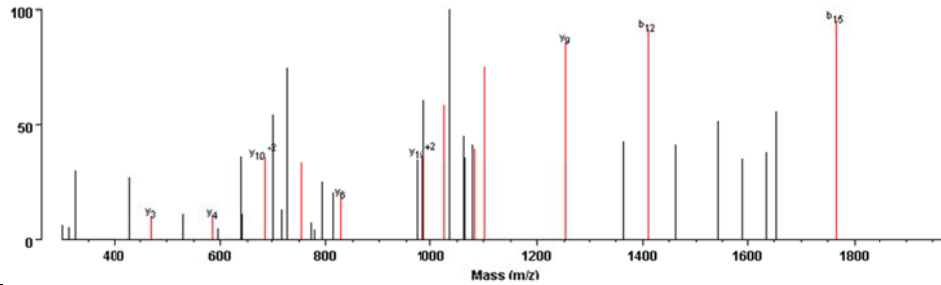

| m/z     | z | Ion Type    |
|---------|---|-------------|
| 472.028 | 1 | y,3,+1      |
| 586.262 | 1 | y,4,+1      |
| 683.192 | 1 | y,10,+2     |
| 755.359 | 1 | b-H2O,7,+1  |
| 828.304 | 1 | y,6,+1      |
| 984.096 | 1 | y,15,+2     |
| 1025.96 | 1 | y-NH3,16,+2 |
|         |   | y-H2O,16,+2 |
| 1082.06 | 1 | y-H2O,17,+2 |
|         |   | y-NH3,17,+2 |
| 1100.57 | 1 | b-H2O,10,+1 |
| 1251.7  | 1 | y,9,+1      |
| 1410.22 | 1 | b,12,+1     |
| 1766.53 | 1 | b,15,+1     |

**M(Oxidation)IFAGIK(XL:C-Alkene)K**

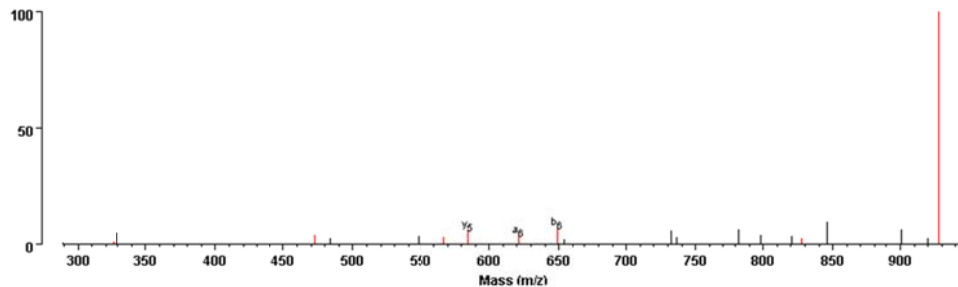

| m/z     | z | Ion Type     |
|---------|---|--------------|
| 325.631 | 1 | y-NH3,2,+1   |
| 472.352 | 1 | b-SOCH4,5,+1 |
| 567.507 | 1 | y-NH3,5,+1   |

|         |   |              |
|---------|---|--------------|
| 584.616 | 1 | y,5,+1       |
| 620.987 | 1 | a,6,+1       |
| 649.261 | 1 | b,6,+1       |
| 827.487 | 1 | y-NH3,7,+1   |
| 927.438 | 1 | MH-SOCH4,,+1 |

| Peptide Sequence | z | d0-dmDSSO |         |   | d10-dmDSSO |          |   |
|------------------|---|-----------|---------|---|------------|----------|---|
|                  |   | MS m/z    | MS2 m/z | z | MS m/z     | MS2 m/z  | z |
| KYIPGTK          | 3 | 633.69    |         |   | 637.0419   | 440.271  | 2 |
| M(ox)IFAGIKK     |   |           |         |   |            | 1012.574 | 1 |

**K(XL:D-Alkene)YIPGTK<sup>+2</sup>**

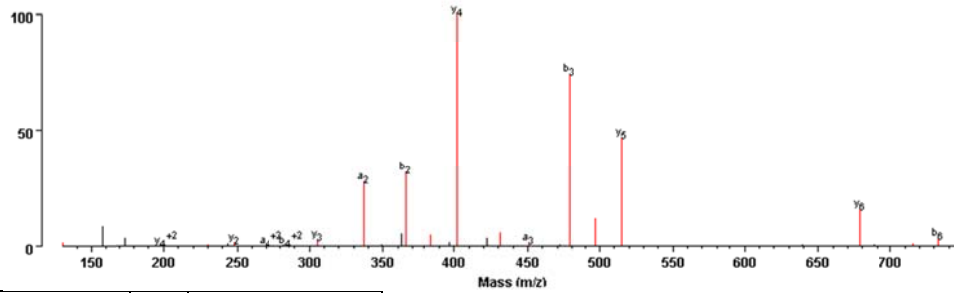

| m/z     | z | Ion Type   |
|---------|---|------------|
| 130.153 | 1 | y-NH3,1,+1 |
| 202.138 | 1 | y,4,+2     |
| 230.099 | 1 | y-H2O,2,+1 |
| 248.159 | 1 | y,2,+1     |
| 274.239 | 1 | a,4,+2     |
| 288.279 | 1 | b,4,+2     |
|         |   | y-NH3,3,+1 |
| 305.296 | 1 | y,3,+1     |
| 337.255 | 1 | a,2,+1     |
| 365.231 | 1 | b,2,+1     |
| 384.347 | 1 | y-H2O,4,+1 |
| 402.313 | 1 | y,4,+1     |
| 431.278 | 1 | MH-H2O,,+2 |
|         |   | MH-NH3,,+2 |
| 450.436 | 1 | a,3,+1     |
| 478.351 | 1 | b,3,+1     |
| 497.198 | 1 | y-H2O,5,+1 |
| 515.369 | 1 | y,5,+1     |
| 678.517 | 1 | y,6,+1     |
| 715.368 | 1 | b-H2O,6,+1 |
| 733.092 | 1 | b,6,+1     |

### MIFAGIK(XL:D-Thiol(Unsaturated))K

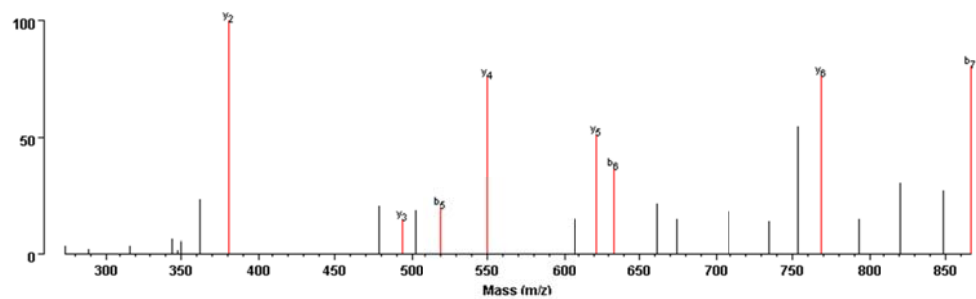

| m/z     | z | Ion Type |
|---------|---|----------|
| 380.263 | 1 | y,2,+1   |
| 493.268 | 1 | y,3,+1   |
| 520.156 | 1 | b,5,+1   |
| 550.34  | 1 | y,4,+1   |
| 621.509 | 1 | y,5,+1   |
| 633.389 | 1 | b,6,+1   |
| 768.288 | 1 | y,6,+1   |
| 866.275 | 1 | b,7,+1   |

| Peptide Sequence | z | d0-dmDSSO |          |    | d10-dmDSSO |          |    |
|------------------|---|-----------|----------|----|------------|----------|----|
|                  |   | MS m/z    | MS2 m/z  | z  | MS m/z     | MS2 m/z  | z  |
| Ac-GDVEK GK      | 3 | 412.2164  | 421.716  | 2  | 415.571    | 424.233  | 2  |
| KK*              |   |           | 375.207* | 1* |            | 380.239* | 1* |

**M(Met-loss+Acetyl)GDVEK(AlkeneB:2H5)GK<sup>+2</sup>**

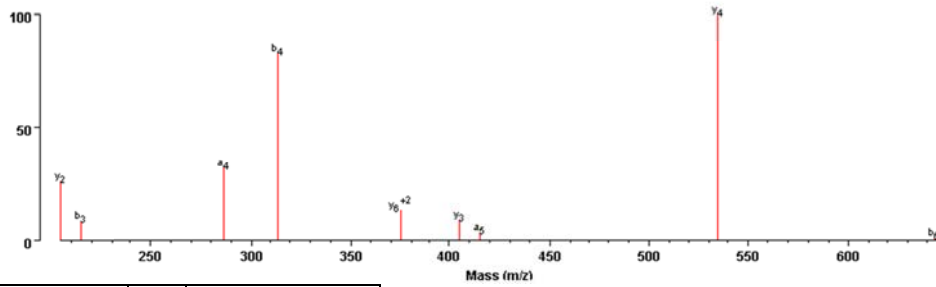

| m/z     | z | Ion Type   |
|---------|---|------------|
| 204.336 | 1 | y,2,+1     |
| 214.851 | 1 | b,3,+1     |
| 285.959 | 1 | a,4,+1     |
| 313.909 | 1 | b,4,+1     |
|         |   | b-H2O,6,+2 |
|         |   | b-NH3,6,+2 |
| 374.578 | 1 | y,6,+2     |
| 405.2   | 1 | y,3,+1     |
| 415.4   | 1 | MH-H2O,,+2 |
|         |   | a,5,+1     |
|         |   | MH-NH3,,+2 |
| 534.373 | 1 | y,4,+1     |
| 643.792 | 1 | b,6,+1     |



| Peptide Sequence   | z | d0-dmDSSO |          |    | d10-dmDSSO |          |    |
|--------------------|---|-----------|----------|----|------------|----------|----|
|                    |   | MS m/z    | MS2 m/z  | z  | MS m/z     | MS2 m/z  | z  |
| Ac-GDVEKGGK<br>KK* | 3 | 454.9164  | 485.767  | 2  | 458.2704   | 488.280  | 2  |
|                    |   |           | 375.207* | 1* |            | 380.239* | 1* |

**M(Met-loss+Acetyl)GDVEK(AlkeneB:2H5)GKK<sup>+2</sup>**

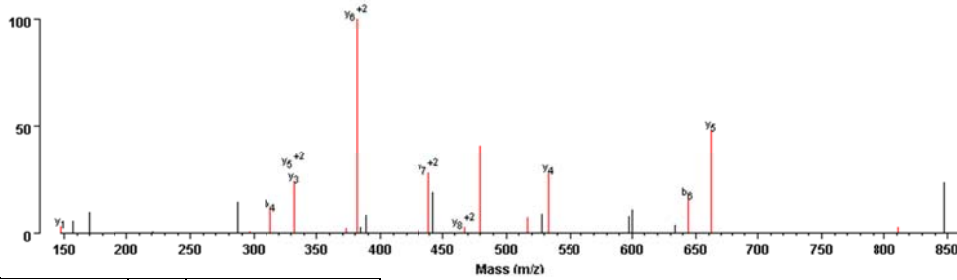

| m/z     | z | Ion Type   |
|---------|---|------------|
| 146.958 | 1 | y,1,+1     |
| 296.304 | 1 | b-H2O,4,+1 |
| 313.91  | 1 | b,4,+1     |
|         |   | b-NH3,6,+2 |
|         |   | b-H2O,6,+2 |
| 332.231 | 1 | y,3,+1     |
|         |   | y,5,+2     |
| 372.608 | 1 | y-NH3,6,+2 |
|         |   | y-H2O,6,+2 |
| 381.572 | 1 | y,6,+2     |
| 429.936 | 1 | y-H2O,7,+2 |
|         |   | y-NH3,7,+2 |
| 438.997 | 1 | y,7,+2     |
| 467.353 | 1 | y,8,+2     |
| 479.326 | 1 | MH-H2O,,+2 |
|         |   | MH-NH3,,+2 |
| 516.724 | 1 | y-NH3,4,+1 |
| 533.382 | 1 | y,4,+1     |
| 644.303 | 1 | b,6,+1     |
|         |   | y-H2O,5,+1 |
| 662.303 | 1 | y,5,+1     |
| 811.501 | 1 | b-H2O,8,+1 |
| 859.707 | 1 | y-NH3,7,+1 |

| Peptide Sequence | z | d0-dmDSSO |          |    | d10-dmDSSO |         |   |
|------------------|---|-----------|----------|----|------------|---------|---|
|                  |   | MS m/z    | MS2 m/z  | z  | MS m/z     | MS2 m/z | z |
| KIFVQK           | 3 | 491.947   | 415.760  | 2  | 495.3013   | 418.279 | 2 |
| GGKHK*           |   |           | 626.312* | 1* |            | 631.342 | 1 |

**K(AlkeneB:2H5)IFVQK<sup>+2</sup>**

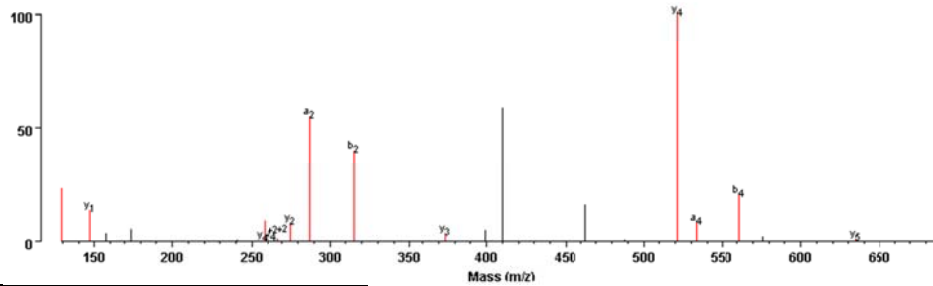

| m/z     | z | Ion Type   |
|---------|---|------------|
| 129.025 | 1 | y-NH3,2,+2 |
| 147.263 | 1 | y,1,+1     |
| 258.263 | 1 | y-NH3,2,+1 |
| 260.863 | 1 | y,4,+2     |
| 267.203 | 1 | a,4,+2     |
| 275.318 | 1 | y,2,+1     |
| 287.269 | 1 | a,2,+1     |
| 315.18  | 1 | b,2,+1     |
| 374.183 | 1 | y,3,+1     |
| 521.181 | 1 | y,4,+1     |
| 533.45  | 1 | a,4,+1     |
| 561.606 | 1 | b,4,+1     |
| 634.442 | 1 | y,5,+1     |

**GGK(ThioID:2H5)HK**

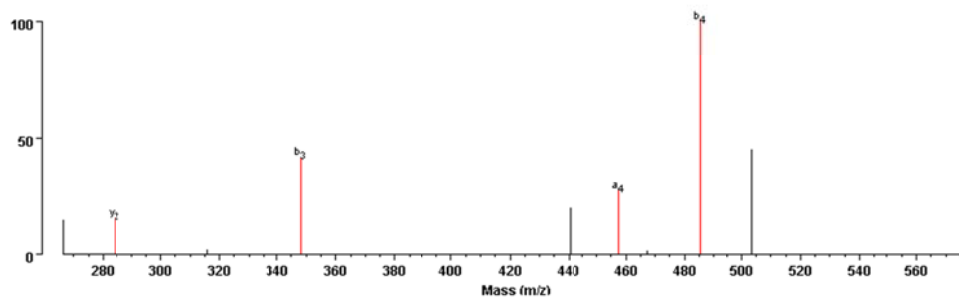

| m/z     | z | Ion Type |
|---------|---|----------|
| 284.121 | 1 | y,2,+1   |
| 348.282 | 1 | b,3,+1   |
| 457.586 | 1 | a,4,+1   |
| 485.436 | 1 | b,4,+1   |

| Peptide Sequence | z | d0-dmDSSO |          |    | d10-dmDSSO |         |    |
|------------------|---|-----------|----------|----|------------|---------|----|
|                  |   | MS m/z    | MS2 m/z  | z  | MS m/z     | MS2 m/z | z  |
| KIFVQK<br>KK*    | 3 | 408.2464  | 415.760  | 2  | 411.601    | 418.277 | 2  |
|                  |   |           | 375.207* | 1* |            | 380.24* | 1* |

**K(AlkeneB:2H5)IFVQK<sup>+2</sup>**

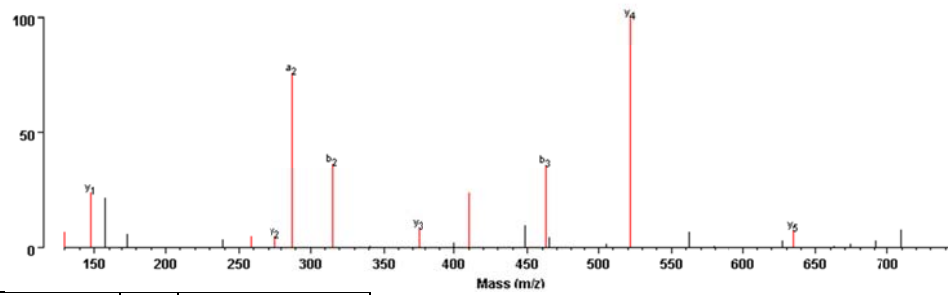

| m/z     | z | Ion Type   |
|---------|---|------------|
| 129.26  | 1 | y-NH3,2,+2 |
| 147.224 | 1 | y,1,+1     |
| 258.344 | 1 | y-NH3,2,+1 |
| 275.256 | 1 | y,2,+1     |
| 287.161 | 1 | a,2,+1     |
| 315.176 | 1 | b,2,+1     |
| 374.069 | 1 | y,3,+1     |
| 410.018 | 1 | MH-NH3,,+2 |
| 462.219 | 1 | b,3,+1     |
| 521.369 | 1 | y,4,+1     |
| 634.426 | 1 | y,5,+1     |

| Peptide Sequence | z | d0-dmDSSO |          |    | d10-dmDSSO |          |    |
|------------------|---|-----------|----------|----|------------|----------|----|
|                  |   | MS m/z    | MS2 m/z  | z  | MS m/z     | MS2 m/z  | z  |
| KIFVQK           | 3 | 479.6041  | 415.764  | 2  | 482.957    | 418.277  | 2  |
| KGER*            |   |           | 589.279* | 1* |            | 612.323* | 1* |

**K(AlkeneB:2H5)IFVQK<sup>+2</sup>**

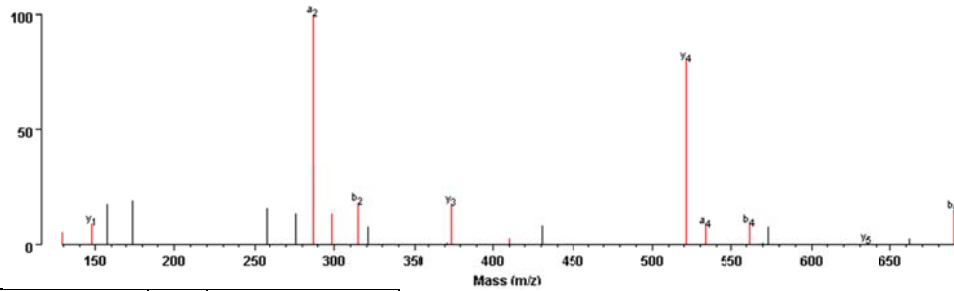

| m/z      | z | Ion Type                |
|----------|---|-------------------------|
| 129.137  | 1 | y-NH <sub>3</sub> ,2,+2 |
| 147.496  | 1 | y,1,+1                  |
| 287.27   | 1 | a,2,+1                  |
| 298.48   | 1 | b-NH <sub>3</sub> ,2,+1 |
| 315.081  | 1 | b,2,+1                  |
| 374.308  | 1 | y,3,+1                  |
| 410.076  | 1 | MH-NH <sub>3</sub> ,,+2 |
| 521.185  | 1 | y,4,+1                  |
| 5.33E+02 | 1 | a,4,+1                  |
| 561.663  | 1 | b,4,+1                  |
| 634.405  | 1 | y,5,+1                  |
| 689.25   | 1 | b,5,+1                  |

| Peptide Sequence | z | d0-dmDSSO |          |    | d10-dmDSSO |          |    |
|------------------|---|-----------|----------|----|------------|----------|----|
|                  |   | MS m/z    | MS2 m/z  | z  | MS m/z     | MS2 m/z  | z  |
| GGKHK*           | 5 | 429.8293  | 297.672* | 2* | 431.8418   | 300.189* | 2* |
| HKTGPNLHGLFGR    |   |           | 511.929  | 3  |            | 513.607  | 3  |

**HK(ThioD)TGPNLHGLFGR<sup>+3</sup>**

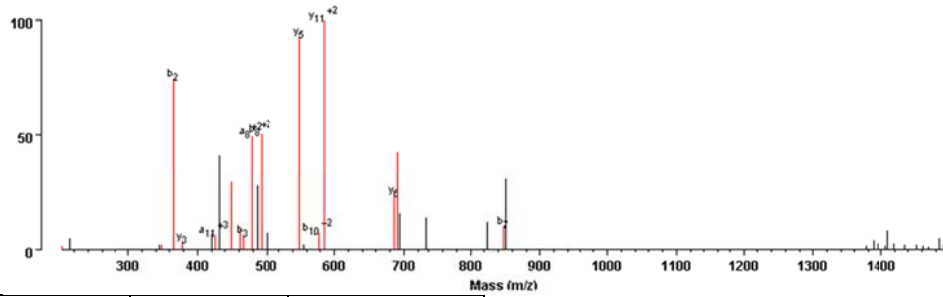

| m/z     | z        | Ion Type    |
|---------|----------|-------------|
| 201.812 | 1        | b-H2O,5,+3  |
|         |          | b-NH3,5,+3  |
| 349.135 | 1        | b-NH3,2,+1  |
| 366.08  | 1        | b,2,+1      |
| 378.993 | 1        | y,3,+1      |
| 425.312 | 1        | a,11,+3     |
| 449.26  | 1        | b-H2O,3,+1  |
|         |          | y-NH3,8,+2  |
| 461.144 | 1        | y-NH3,12,+3 |
| 467.004 | 1        | b,3,+1      |
| 479.476 | 1        | a,8,+2      |
| 493.352 | 1.00E+00 | b,8,+2      |
| 549.152 | 1        | y,5,+1      |
| 577.89  | 1        | b,10,+2     |
| 585.024 | 1        | y,11,+2     |
| 686.37  | 1        | y,6,+1      |
| 689.963 | 1        | y-H2O,12,+2 |
|         |          | y-NH3,12,+2 |
| 848.281 | 1        | b,7,+1      |

| Peptide Sequence                       | z | d0-dmDSSO |                     |         | d10-dmDSSO |         |   |
|----------------------------------------|---|-----------|---------------------|---------|------------|---------|---|
|                                        |   | MS m/z    | MS2 m/z             | z       | MS m/z     | MS2 m/z | z |
| KTGQAPGFSYTDANK<br>GITWGEETLMEYLENPKK* | 4 | 981.715   | 826.899<br>1127.52* | 2<br>2* | 984.23     |         |   |

**K(AlkeneB)TGQAPGFSYTDANK<sup>+2</sup>**

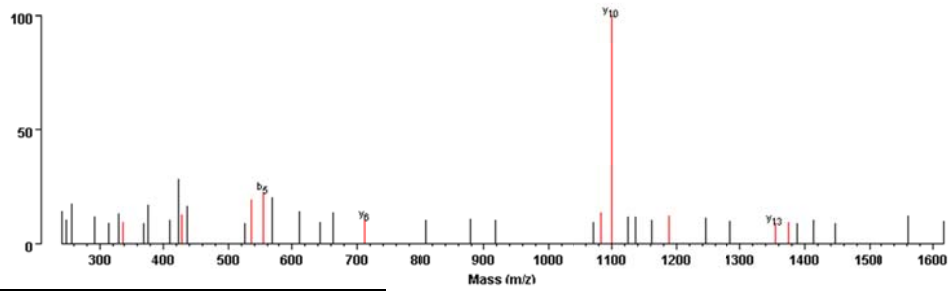

| m/z     | z | Ion Type    |
|---------|---|-------------|
| 337.725 | 1 | b-NH3,3,+1  |
|         |   | b-H2O,3,+1  |
| 429.193 | 1 | y-H2O,4,+1  |
| 536.13  | 1 | b-H2O,5,+1  |
| 554.344 | 1 | b,5,+1      |
| 711.674 | 1 | y,6,+1      |
| 1082.66 | 1 | y-NH3,10,+1 |
| 1099.27 | 1 | y,10,+1     |
| 1188.29 | 1 | b-H2O,11,+1 |
| 1355.16 | 1 | y,13,+1     |
| 1374.75 | 1 | b-H2O,13,+1 |

| Peptide Sequence                | z | d0-dmDSSO |         |    | d10-dmDSSO |          |    |
|---------------------------------|---|-----------|---------|----|------------|----------|----|
|                                 |   | MS m/z    | MS2 m/z | z  | MS m/z     | MS2 m/z  | z  |
| K <b>TGQAPGFSYTDANK</b><br>KGER | 3 | 753.6979  | 826.904 | 2  | 757.0514   | 829.419  | 2  |
|                                 |   |           | 589.28* | 1* |            | 594.311* | 1* |

**K(AlkeneB:2H5)TGQAPGFSYTDANK<sup>+2</sup>**

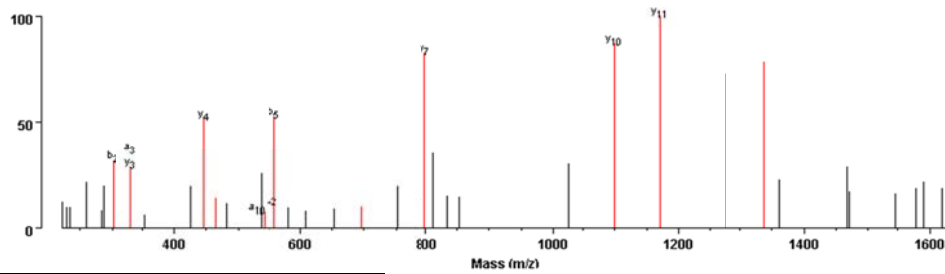

| m/z     | z | Ion Type    |
|---------|---|-------------|
| 302.791 | 1 | b,2,+1      |
| 332.168 | 1 | y,3,+1      |
|         |   | a,3,+1      |
| 446.892 | 1 | y,4,+1      |
| 464.241 | 1 | y-H2O,8,+2  |
|         |   | y-NH3,8,+2  |
| 541.393 | 1 | b-H2O,5,+1  |
|         |   | y-H2O,10,+2 |
|         |   | y-NH3,10,+2 |
|         |   | a,10,+2     |
| 559.404 | 1 | b,5,+1      |
| 696.286 | 1 | b-NH3,7,+1  |
| 798.288 | 1 | y,7,+1      |
| 1099.42 | 1 | y,10,+1     |
| 1170.56 | 1 | y,11,+1     |
| 1337.94 | 1 | y-H2O,13,+1 |

| Peptide Sequence          | z | d0-dmDSSO |                     |         | d10-dmDSSO |                     |         |
|---------------------------|---|-----------|---------------------|---------|------------|---------------------|---------|
|                           |   | MS m/z    | MS2 m/z             | z       | MS m/z     | MS2 m/z             | z       |
| KTGQAPGFSYTDANK<br>KATNE* | 3 | 778.0289  | 842.887<br>630.311* | 2<br>1* | 781.3847   | 845.402<br>635.344* | 2<br>1* |

**K(AlkeneB)TGQAPGFSYTDANK<sup>+2</sup>**

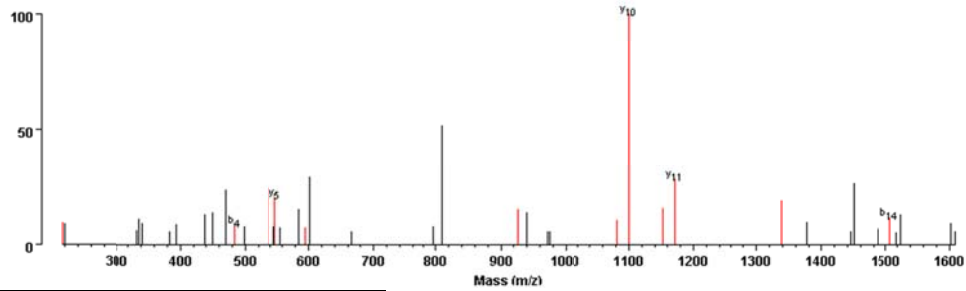

| m/z     | z | Ion Type                 |
|---------|---|--------------------------|
| 215.345 | 1 | y-H <sub>2</sub> O,4,+2  |
|         |   | y-NH <sub>3</sub> ,4,+2  |
| 483.187 | 1 | b,4,+1                   |
| 537.327 | 1 | b-NH <sub>3</sub> ,5,+1  |
| 548.167 | 1 | y,5,+1                   |
| 594.239 | 1 | b-H <sub>2</sub> O,11,+2 |
| 925.394 | 1 | b-NH <sub>3</sub> ,9,+1  |
| 1081.35 | 1 | y-H <sub>2</sub> O,10,+1 |
| 1099.34 | 1 | y,10,+1                  |
| 1152.39 | 1 | y-H <sub>2</sub> O,11,+1 |
| 1170.47 | 1 | y,11,+1                  |
| 1337.53 | 1 | y-H <sub>2</sub> O,13,+1 |
| 1506.66 | 1 | b,14,+1                  |



| Peptide Sequence  | z | d0-dmDSSO |                     |         | d10-dmDSSO |                     |         |
|-------------------|---|-----------|---------------------|---------|------------|---------------------|---------|
|                   |   | MS m/z    | MS2 m/z             | z       | MS m/z     | MS2 m/z             | z       |
| MIFAGIKK<br>KGER* | 4 | 396.2183  | 504.275<br>279.157* | 2<br>2* | 398.7339   | 506.790<br>281.672* | 2<br>2* |

**MIFAGIK(ThioID)K<sup>+2</sup>**

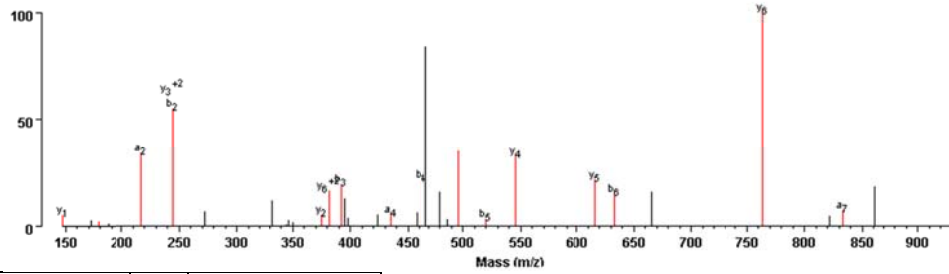

| m/z     | z | Ion Type   |
|---------|---|------------|
| 147.132 | 1 | y,1,+1     |
| 179.444 | 1 | y-NH3,2,+2 |
| 217.314 | 1 | a,2,+1     |
| 245.12  | 1 | b,2,+1     |
|         |   | y,3,+2     |
| 375.174 | 1 | y,2,+1     |
| 382.054 | 1 | y,6,+2     |
| 392.246 | 1 | b,3,+1     |
| 435.027 | 1 | a,4,+1     |
| 462.885 | 1 | b,4,+1     |
| 495.769 | 1 | MH-NH3,,+2 |
| 520.335 | 1 | b,5,+1     |
| 545.236 | 1 | y,4,+1     |
| 616.193 | 1 | y,5,+1     |
| 633.224 | 1 | b,6,+1     |
| 763.264 | 1 | y,6,+1     |
| 833.437 | 1 | a,7,+1     |

| Peptide Sequence      | z | d0-dmDSSO |          |    | d10-dmDSSO |          |    |
|-----------------------|---|-----------|----------|----|------------|----------|----|
|                       |   | MS m/z    | MS2 m/z  | z  | MS m/z     | MS2 m/z  | z  |
| M(ox)IFAGIKK<br>KGER* | 4 | 400.2177  | 512.274  | 2  | 402.7331   | 514.787  | 2  |
|                       |   |           | 279.157* | 2* |            | 281.673* | 2* |

**M(Oxidation)IFAGIK(ThioID:2H5)K<sup>+2</sup>**

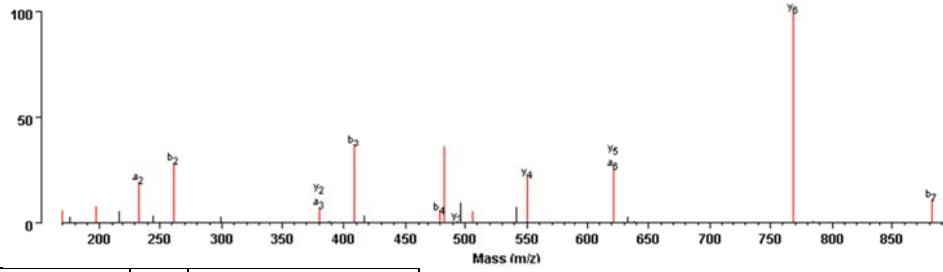

| m/z     | z | Ion Type     |
|---------|---|--------------|
| 169.314 | 1 | a-SOCH4,2,+1 |
| 197.278 | 1 | b-SOCH4,2,+1 |
| 232.967 | 1 | a,2,+1       |
| 261.123 | 1 | b,2,+1       |
| 380.172 | 1 | a,3,+1       |
|         |   | y,2,+1       |
| 408.303 | 1 | b,3,+1       |
| 479.702 | 1 | b,4,+1       |
| 483.131 | 1 | MH-SOCH4,,+2 |
| 493.447 | 1 | y,3,+1       |
| 506.433 | 1 | MH-NH3,,+2   |
| 550.129 | 1 | y,4,+1       |
| 621.197 | 1 | a,6,+1       |
|         |   | y,5,+1       |
| 768.414 | 1 | y,6,+1       |
| 882.518 | 1 | b,7,+1       |
